# Supplementary material for: An approach to forecast human cancer by profiling microRNA expressions from NGS data
Source: Springer Nature journal article supplement (doi:10.1186/s12885-016-3042-2), 2017-01-25
Supplement: MOESM1 [file 12019118]

**Additional File 1: List of Tumour and Normal tissue data samples with respect to Lung Cancer, Hepatocellular Carcinoma and Carcinomas of the bladder**

| <b>Lung Cancer</b>              |                 |                              |                       |                 |                              |
|---------------------------------|-----------------|------------------------------|-----------------------|-----------------|------------------------------|
| <b>Normal Samples</b>           |                 |                              | <b>Tumour Samples</b> |                 |                              |
| <b>SI No</b>                    | <b>SRR list</b> | <b>Total Number of Reads</b> | <b>SI No</b>          | <b>SRR list</b> | <b>Total Number of Reads</b> |
| 1                               | SRR372672       | 53,022,826                   | 1                     | SRR372671       | 41,195,137                   |
| 2                               | SRR372670       | 48,415,574                   | 2                     | SRR372669       | 34,754,806                   |
| 3                               | SRR372668       | 38,287,217                   | 3                     | SRR372667       | 37,776,488                   |
| 4                               | SRR372666       | 35,143,921                   | 4                     | SRR372665       | 37,507,931                   |
| 5                               | SRR372664       | 33,656,348                   | 5                     | SRR372663       | 33,544,033                   |
| 6                               | SRR372662       | 32,770,003                   | 6                     | SRR372661       | 37,053,587                   |
| 7                               | SRR372660       | 37,049,180                   | 7                     | SRR372659       | 37,140,785                   |
| 8                               | SRR372658       | 33,354,253                   | 8                     | SRR372657       | 39,753,719                   |
| 9                               | SRR372656       | 36,446,549                   | 9                     | SRR372655       | 33,783,427                   |
| 10                              | SRR372654       | 33,777,251                   | 10                    | SRR372653       | 32,579,770                   |
| 11                              | SRR372652       | 25,425,497                   | 11                    | SRR372651       | 37,486,200                   |
| 12                              | SRR372650       | 25,709,897                   | 12                    | SRR372649       | 36,416,257                   |
| 13                              | SRR372648       | 35,058,620                   | 13                    | SRR372647       | 36,647,675                   |
| 14                              | SRR372646       | 35,759,542                   | 14                    | SRR372645       | 35,343,033                   |
| 15                              | SRR372644       | 33,870,711                   | 15                    | SRR372643       | 18,878,440                   |
| 16                              | SRR372642       | 33,437,124                   | 16                    | SRR372641       | 35,003,820                   |
| 17                              | SRR372640       | 35,133,221                   | 17                    | SRR372639       | 31,413,165                   |
| 18                              | SRR372638       | 28,670,513                   | 18                    | SRR372637       | 32,131,568                   |
| 19                              | SRR372636       | 30,822,280                   | 19                    | SRR372635       | 32,458,345                   |
| 20                              | SRR372634       | 25,672,582                   | 20                    | SRR372633       | 16,507,199                   |
|                                 |                 |                              | 21                    | SRR372629       | 20,421,312                   |
| <b>Hepatocellular Carcinoma</b> |                 |                              |                       |                 |                              |
| <b>Normal Samples</b>           |                 |                              | <b>Tumour Samples</b> |                 |                              |
| <b>SI No</b>                    | <b>SRR list</b> | <b>Total Number of Reads</b> | <b>SI No</b>          | <b>SRR list</b> | <b>Total Number of Reads</b> |
| 1                               | SRR1642941      | 16,603,341                   | 1                     | SRR1642942      | 16,717,834                   |
| 2                               | SRR1642943      | 17,792,026                   | 2                     | SRR1642946      | 15,989,919                   |
| 3                               | SRR1642945      | 17,199,935                   | 3                     | SRR1642948      | 19,656,886                   |
| 4                               | SRR1642949      | 21,226,581                   | 4                     | SRR1642950      | 20,922,731                   |
| 5                               | SRR1642951      | 23,625,569                   | 5                     | SRR1642952      | 28,312,100                   |
| 6                               | SRR1642953      | 9,954,488                    | 6                     | SRR1642954      | 11,923,774                   |
| 7                               | SRR1642955      | 13,051,854                   | 7                     | SRR1642956      | 10,226,512                   |
| 8                               | SRR1642957      | 9,170,685                    | 8                     | SRR1642958      | 9,302,762                    |
| 9                               | SRR1642959      | 11,348,075                   | 9                     | SRR1642960      | 11,297,425                   |
| 10                              | SRR1642961      | 10,776,584                   | 10                    | SRR1642962      | 10,330,569                   |
| 11                              | SRR1642963      | 11,279,698                   | 11                    | SRR1642964      | 9,241,593                    |
| 12                              | SRR1642965      | 11,067,843                   | 12                    | SRR1642966      | 12,934,901                   |
| 13                              | SRR1642967      | 13,231,006                   | 13                    | SRR1642968      | 13,555,600                   |

|    |            |            |    |            |            |
|----|------------|------------|----|------------|------------|
| 14 | SRR1642969 | 10,721,275 | 14 | SRR1642970 | 10,163,737 |
| 15 | SRR1642971 | 10,550,802 | 15 | SRR1642972 | 11,090,706 |
| 16 | SRR1642973 | 12,966,238 | 16 | SRR1642974 | 11,892,742 |
| 17 | SRR1642975 | 13,613,148 | 17 | SRR1642976 | 11,607,362 |
| 18 | SRR1642977 | 22,315,149 | 18 | SRR1642978 | 10,707,105 |
| 19 | SRR1642979 | 10,627,811 | 19 | SRR1642980 | 8,413,826  |
| 20 | SRR1642981 | 11,498,149 | 20 | SRR1642982 | 11,074,809 |
| 21 | SRR1642983 | 12,045,606 | 21 | SRR1642984 | 9,696,047  |
| 22 | SRR1642985 | 11,820,167 | 22 | SRR1642986 | 11,415,996 |
| 23 | SRR1642987 | 12301261   | 23 | SRR1642988 | 10,964,981 |

**Carcinomas of the bladder**

| Normal Samples |           |                       | Tumour Samples |           |                       |
|----------------|-----------|-----------------------|----------------|-----------|-----------------------|
| SI No          | SRR list  | Total Number of Reads | SI No          | SRR list  | Total Number of Reads |
| 1              | SRR333656 | 13,964,069            | 1              | SRR333655 | 18,900,508            |
| 2              | SRR333658 | 18,961,597            | 2              | SRR333657 | 17,550,728            |
| 3              | SRR333660 | 15,606,203            | 3              | SRR333659 | 19,114,398            |
| 4              | SRR333662 | 16,012,177            | 4              | SRR333661 | 18,672,525            |
| 5              | SRR333664 | 14,333,941            | 5              | SRR333663 | 17,840,448            |
| 6              | SRR333666 | 11,350,981            | 6              | SRR333665 | 9,709,277             |
| 7              | SRR333668 | 17,755,521            | 7              | SRR333667 | 18,493,909            |
| 8              | SRR333670 | 10,019,292            | 8              | SRR333669 | 13,103,308            |
| 9              | SRR333672 | 17,654,215            | 9              | SRR333671 | 20,072,244            |
| 10             | SRR333674 | 19,283,954            | 10             | SRR333673 | 18,695,794            |
