# Supplementary material for: An approach to forecast human cancer by profiling microRNA expressions from NGS data
Source: Springer Nature journal article supplement (doi:10.1186/s12885-016-3042-2), 2017-01-25
Supplement: MOESM2 [file 12019118]

**Additional File 2: List of disease specific microRNAs with respect to Lung Cancer, Hepatocellular Carcinoma and Carcinomas of the bladder used in the current study**

| <b>SL. No</b> | <b>Lung Cancer</b> | <b>Hepatocellular Carcinoma</b> | <b>Carcinomas of bladder</b> |
|---------------|--------------------|---------------------------------|------------------------------|
| 1             | hsa-let-7c-5p      | hsa-let-7c-5p                   | hsa-miR-16-5p                |
| 2             | hsa-let-7d-5p      | hsa-let-7d-5p                   | hsa-miR-17-5p                |
| 3             | hsa-let-7e-5p      | hsa-let-7e-5p                   | hsa-miR-18a-5p               |
| 4             | hsa-let-7g-5p      | hsa-miR-18a-5p                  | hsa-miR-19a-3p               |
| 5             | hsa-let-7i-5p      | hsa-miR-23a-3p                  | hsa-miR-23a-3p               |
| 6             | hsa-miR-7-1-3p     | hsa-miR-27a-3p                  | hsa-miR-26a-5p               |
| 7             | hsa-miR-17-5p      | hsa-miR-29a-3p                  | hsa-miR-26b-5p               |
| 8             | hsa-miR-18a-5p     | hsa-miR-30a-5p                  | hsa-miR-96-5p                |
| 9             | hsa-miR-18a-3p     | hsa-miR-100-5p                  | hsa-miR-99a-5p               |
| 10            | hsa-miR-19a-3p     | hsa-miR-16-2-3p                 | hsa-miR-103a-3p              |
| 11            | hsa-miR-19b-3p     | hsa-miR-197-3p                  | hsa-miR-192-5p               |
| 12            | hsa-miR-20b-5p     | hsa-miR-148a-3p                 | hsa-miR-10b-5p               |
| 13            | hsa-miR-24-1-5p    | hsa-miR-30d-5p                  | hsa-miR-34a-5p               |
| 14            | hsa-miR-29a-3p     | hsa-miR-34a-5p                  | hsa-miR-182-5p               |
| 15            | hsa-miR-30c-2-3p   | hsa-miR-182-5p                  | hsa-miR-183-5p               |
| 16            | hsa-miR-33a-5p     | hsa-miR-183-5p                  | hsa-miR-205-5p               |
| 17            | hsa-miR-92b-3p     | hsa-miR-199b-5p                 | hsa-miR-210-3p               |
| 18            | hsa-miR-1-3p       | hsa-miR-199b-3p                 | hsa-miR-214-3p               |
| 19            | hsa-miR-23a-3p     | hsa-miR-204-5p                  | hsa-miR-221-5p               |
| 20            | hsa-miR-101-3p     | hsa-miR-210-3p                  | hsa-miR-221-3p               |
| 21            | hsa-miR-103a-3p    | hsa-miR-217                     | hsa-miR-222-3p               |
| 22            | hsa-miR-197-3p     | hsa-let-7g-5p                   | hsa-miR-223-3p               |
| 23            | hsa-miR-135b-5p    | hsa-let-7i-5p                   | hsa-miR-200b-3p              |
| 24            | hsa-miR-138-5p     | hsa-miR-30b-5p                  | hsa-miR-23b-3p               |
| 25            | hsa-miR-146a-5p    | hsa-miR-143-5p                  | hsa-miR-125b-5p              |
| 26            | hsa-miR-148a-3p    | hsa-miR-143-3p                  | hsa-miR-133a-3p              |
| 27            | hsa-miR-153-3p     | hsa-miR-145-5p                  | hsa-miR-141-3p               |
| 28            | hsa-miR-186-5p     | hsa-miR-125a-5p                 | hsa-miR-143-3p               |
| 29            | hsa-miR-187-3p     | hsa-miR-136-3p                  | hsa-miR-144-5p               |
| 30            | hsa-miR-194-5p     | hsa-miR-146a-5p                 | hsa-miR-145-5p               |
| 31            | hsa-miR-199b-3p    | hsa-miR-185-5p                  | hsa-miR-126-5p               |
| 32            | hsa-miR-200a-3p    | hsa-miR-186-5p                  | hsa-miR-126-3p               |
| 33            | hsa-miR-210-3p     | hsa-miR-200a-3p                 | hsa-miR-185-5p               |
| 34            | hsa-miR-215-5p     | hsa-miR-151a-5p                 | hsa-miR-195-5p               |
| 35            | hsa-miR-21-5p      | hsa-miR-151a-3p                 | hsa-miR-200c-3p              |
| 36            |                    | hsa-miR-92b-3p                  | hsa-miR-155-5p               |
| 37            |                    | hsa-miR-151b                    | hsa-miR-29c-3p               |
| 38            |                    | hsa-miR-21-5p                   | hsa-miR-200a-3p              |
| 39            |                    | hsa-miR-17-5p                   | hsa-miR-335-5p               |
| 40            |                    | hsa-miR-122-5p                  | hsa-miR-429                  |
| 41            |                    | hsa-miR-101-3p                  | hsa-miR-451a                 |
| 42            |                    | hsa-miR-125b-5p                 | hsa-miR-409-3p               |
| 43            |                    |                                 | hsa-miR-146b-5p              |
| 44            |                    |                                 | hsa-miR-493-5p               |
| 45            |                    |                                 | hsa-miR-320c                 |
