# Supplementary material for: An approach to forecast human cancer by profiling microRNA expressions from NGS data
Source: Springer Nature journal article supplement (doi:10.1186/s12885-016-3042-2), 2017-01-25
Supplement: MOESM3 [file 12019118]

**Additional File 3: Preprocessed NGS data samples of Normal and Tumour tissues with respect to Lung Cancer, Hepatocellular Carcinoma and Carcinomas of the bladder**

| Lung Cancer              |            |                       |                               |                |            |                       |                               |
|--------------------------|------------|-----------------------|-------------------------------|----------------|------------|-----------------------|-------------------------------|
| Normal Samples           |            |                       |                               | Tumour Samples |            |                       |                               |
| SI No                    | SRR list   | Total Number of Reads | Total Number of quality reads | SI No          | SRR list   | Total Number of Reads | Total Number of quality reads |
| 1                        | SRR372672  | 53,022,826            | 40,456,567                    | 1              | SRR372671  | 41,195,137            | 37,527,724                    |
| 2                        | SRR372670  | 48,415,574            | 37,881,724                    | 2              | SRR372669  | 34,754,806            | 25,858,278                    |
| 3                        | SRR372668  | 38,287,217            | 35,288,346                    | 3              | SRR372667  | 37,776,488            | 33,503,199                    |
| 4                        | SRR372666  | 35,143,921            | 33,572,344                    | 4              | SRR372665  | 37,507,931            | 35,582,584                    |
| 5                        | SRR372664  | 33,656,348            | 30,399,221                    | 5              | SRR372663  | 33,544,033            | 30,515,856                    |
| 6                        | SRR372662  | 32,770,003            | 28,866,319                    | 6              | SRR372661  | 37,053,587            | 35,709,833                    |
| 7                        | SRR372660  | 37,049,180            | 31,857,768                    | 7              | SRR372659  | 37,140,785            | 32,634,806                    |
| 8                        | SRR372658  | 33,354,253            | 27,750,442                    | 8              | SRR372657  | 39,753,719            | 36,722,436                    |
| 9                        | SRR372656  | 36,446,549            | 34,294,229                    | 9              | SRR372655  | 33,783,427            | 31,307,401                    |
| 10                       | SRR372654  | 33,777,251            | 31,335,908                    | 10             | SRR372653  | 32,579,770            | 30,100,982                    |
| 11                       | SRR372652  | 25,425,497            | 19,821,127                    | 11             | SRR372651  | 37,486,200            | 34,550,722                    |
| 12                       | SRR372650  | 25,709,897            | 22,732,035                    | 12             | SRR372649  | 36,416,257            | 31,554,431                    |
| 13                       | SRR372648  | 35,058,620            | 31,000,768                    | 13             | SRR372647  | 36,647,675            | 31,299,960                    |
| 14                       | SRR372646  | 35,759,542            | 31,389,437                    | 14             | SRR372645  | 35,343,033            | 31,713,572                    |
| 15                       | SRR372644  | 33,870,711            | 30,378,391                    | 15             | SRR372643  | 18,878,440            | 14,662,460                    |
| 16                       | SRR372642  | 33,437,124            | 33,316,351                    | 16             | SRR372641  | 35,003,820            | 34,792,286                    |
| 17                       | SRR372640  | 35,133,221            | 34,813,137                    | 17             | SRR372639  | 31,413,165            | 31,194,966                    |
| 18                       | SRR372638  | 28,670,513            | 27,800,828                    | 18             | SRR372637  | 32,131,568            | 31,841,130                    |
| 19                       | SRR372636  | 30,822,280            | 30,230,479                    | 19             | SRR372635  | 32,458,345            | 32,140,731                    |
| 20                       | SRR372634  | 25,672,582            | 24,098,484                    | 20             | SRR372633  | 16,507,199            | 14,819,796                    |
|                          |            |                       |                               | 21             | SRR372629  | 20,421,312            | 18,511,100                    |
| Hepatocellular Carcinoma |            |                       |                               |                |            |                       |                               |
| Normal Samples           |            |                       |                               | Tumour Samples |            |                       |                               |
| SI No                    | Run        | Total Number of Reads | Total Number of quality reads | SI No          | Run        | Total Number of Reads | Total Number of quality reads |
| 1                        | SRR1642941 | 16,603,341            | 16,602,920                    | 1              | SRR1642942 | 16,717,834            | 12,970,625                    |
| 2                        | SRR1642943 | 17,792,026            | 17,791,488                    | 2              | SRR1642946 | 15,989,919            | 15,989,541                    |
| 3                        | SRR1642945 | 17,199,935            | 17,199,507                    | 3              | SRR1642948 | 19,656,886            | 19,656,445                    |
| 4                        | SRR1642949 | 21,226,581            | 21,225,970                    | 4              | SRR1642950 | 20,922,731            | 20,922,227                    |
| 5                        | SRR1642951 | 23,625,569            | 23,625,014                    | 5              | SRR1642952 | 28,312,100            | 28,311,416                    |
| 6                        | SRR1642953 | 9,954,488             | 9,954,352                     | 6              | SRR1642954 | 11,923,774            | 11,923,639                    |
| 7                        | SRR1642955 | 13,051,854            | 13,051,638                    | 7              | SRR1642956 | 10,226,512            | 10,226,364                    |
| 8                        | SRR1642957 | 9,170,685             | 9,170,541                     | 8              | SRR1642958 | 9,302,762             | 9,302,618                     |
| 9                        | SRR1642959 | 11,348,075            | 11,347,922                    | 9              | SRR1642960 | 11,297,425            | 11,297,279                    |
| 10                       | SRR1642961 | 10,776,584            | 10,776,447                    | 10             | SRR1642962 | 10,330,569            | 10,330,427                    |

|    |            |            |            |    |            |            |            |
|----|------------|------------|------------|----|------------|------------|------------|
| 11 | SRR1642963 | 11,279,698 | 11,279,544 | 11 | SRR1642964 | 9,241,593  | 9,241,481  |
| 12 | SRR1642965 | 11,067,843 | 11,067,621 | 12 | SRR1642966 | 12,934,901 | 12,934,608 |
| 13 | SRR1642967 | 13,231,006 | 13,230,731 | 13 | SRR1642968 | 13,555,600 | 13,555,353 |
| 14 | SRR1642969 | 10,721,275 | 10,721,015 | 14 | SRR1642970 | 10,163,737 | 10,163,553 |
| 15 | SRR1642971 | 10,550,802 | 10,550,583 | 15 | SRR1642972 | 11,090,706 | 11,090,484 |
| 16 | SRR1642973 | 12,966,238 | 12,965,931 | 16 | SRR1642974 | 11,892,742 | 11,892,521 |
| 17 | SRR1642975 | 13,613,148 | 13,612,886 | 17 | SRR1642976 | 11,607,362 | 11,607,182 |
| 18 | SRR1642977 | 22,315,149 | 22,314,762 | 18 | SRR1642978 | 10,707,105 | 10,706,925 |
| 19 | SRR1642979 | 10,627,811 | 10,627,630 | 19 | SRR1642980 | 8,413,826  | 8,413,693  |
| 20 | SRR1642981 | 11,498,149 | 11,497,979 | 20 | SRR1642982 | 11,074,809 | 11,074,621 |
| 21 | SRR1642983 | 12,045,606 | 12,045,390 | 21 | SRR1642984 | 9,696,047  | 9,695,900  |
| 22 | SRR1642985 | 11,820,167 | 11,819,931 | 22 | SRR1642986 | 11,415,996 | 11,415,766 |
| 23 | SRR1642987 | 12301261   | 12,301,051 | 23 | SRR1642988 | 10,964,981 | 10,964,825 |

**Bladder Cancer**

| Normal Samples |           |                       |                               | Tumour Samples |           |                       |                               |
|----------------|-----------|-----------------------|-------------------------------|----------------|-----------|-----------------------|-------------------------------|
| Sl No          | Run       | Total Number of Reads | Total Number of quality reads | Sl No          | Run       | Total Number of Reads | Total Number of quality reads |
| 1              | SRR333656 | 13,964,069            | 2,958,024                     | 1              | SRR333655 | 18,900,508            | 687,649                       |
| 2              | SRR333658 | 18,961,597            | 937,364                       | 2              | SRR333657 | 17,550,728            | 1,325,561                     |
| 3              | SRR333660 | 15,606,203            | 2,888,676                     | 3              | SRR333659 | 19,114,398            | 694,480                       |
| 4              | SRR333662 | 16,012,177            | 2,877,239                     | 4              | SRR333661 | 18,672,525            | 842,369                       |
| 5              | SRR333664 | 14,333,941            | 3,229,522                     | 5              | SRR333663 | 17,840,448            | 1,475,901                     |
| 6              | SRR333666 | 11,350,981            | 3,268,990                     | 6              | SRR333665 | 9,709,277             | 178,510                       |
| 7              | SRR333668 | 17,755,521            | 2,288,703                     | 7              | SRR333667 | 18,493,909            | 1,177,372                     |
| 8              | SRR333670 | 10,019,292            | 2,906,254                     | 8              | SRR333669 | 13,103,308            | 459,829                       |
| 9              | SRR333672 | 17,654,215            | 2,239,830                     | 9              | SRR333671 | 20,072,244            | 493,537                       |
| 10             | SRR333674 | 19,283,954            | 1,079,859                     | 10             | SRR333673 | 18,695,794            | 493,537                       |
