# Supplementary material for: An approach to forecast human cancer by profiling microRNA expressions from NGS data
Source: Springer Nature journal article supplement (doi:10.1186/s12885-016-3042-2), 2017-01-25
Supplement: MOESM4 [file 12019118]

**Additional File 4: Normalized expression values of microRNAs associated with Lung Cancer (page 1)**

| sl No. | hsa-let-7c-5p | hsa-let-7d-5p | hsa-let-7e-5p | hsa-let-7g-5p | hsa-let-7i-5p | hsa-miR-7-1-3p | hsa-miR-17-5p | hsa-miR-18a-5p | hsa-miR-18a-3p | hsa-miR-19a-3p | hsa-miR-19b-3p | hsa-miR-20b-5p | hsa-miR-24-1-5p |
|--------|---------------|---------------|---------------|---------------|---------------|----------------|---------------|----------------|----------------|----------------|----------------|----------------|-----------------|
| 1      | 0.798812496   | 2.390591713   | 0.320442815   | 2.229339503   | 0.848099386   | 1.219199775    | -0.546800096  | -0.454917199   | -0.426249074   | -0.613762685   | -0.393620865   | -0.412642077   | 3.717940386     |
| 2      | 0.183872482   | 1.707537459   | -0.063152994  | 2.404196614   | 0.518341691   | 0.062583243    | -0.541218529  | -0.664443228   | -0.43517971    | -0.904917769   | -1.187051797   | -0.547271919   | 0.158067694     |
| 3      | 0.33913031    | 0.186589385   | 1.290954365   | 0.275155231   | 0.2514736     | -0.889765033   | -0.568378536  | -0.239308702   | -0.281230991   | -0.278389265   | -0.546806518   | 3.602079164    | -0.452169539    |
| 4      | 2.147597445   | 0.147904624   | 1.749309756   | -0.200515995  | 0.325445737   | -0.117684605   | 0.865426103   | 0.713792776    | 0.445960559    | 0.784751989    | 0.445783966    | 2.029764406    | 0.197409568     |
| 5      | 0.790930173   | 0.052843214   | -0.274159695  | -0.237525472  | -0.615753228  | -0.664475667   | -0.48600742   | -0.158848449   | -0.354265912   | -0.223018807   | -0.401064556   | -0.059882164   | -0.41905799     |
| 6      | -0.139819958  | 0.125424954   | 0.991760963   | -0.348100379  | -0.280540867  | -0.110416103   | 0.169059948   | 0.050171986    | -0.599642576   | 0.071792446    | 0.335959909    | 0.09018267     | 0.161916418     |
| 7      | -0.438566153  | -0.638543457  | -0.303443078  | -0.569242506  | 3.606037639   | 0.12208442     | 1.696491502   | -0.111006862   | 0.54479904     | -0.127911107   | 1.523677154    | -0.233708681   | -0.099693076    |
| 8      | -0.058643779  | -0.373517066  | -1.291085406  | 0.554179658   | -0.282463535  | -0.087810023   | -0.677479108  | -0.55219298    | -0.30724799    | -0.766276208   | -0.522551578   | -0.243515163   | -0.150945709    |
| 9      | -0.812378905  | -0.814505564  | 0.802961162   | -0.832288548  | -0.420276954  | 1.653555171    | 3.334923502   | 4.119857018    | 4.131478527    | 3.918316944    | 3.484238838    | -0.405840178   | 1.166342713     |
| 10     | 1.431305392   | -0.426152594  | 0.04773413    | -0.239654003  | -0.693871452  | -0.994308007   | -0.578744111  | -0.356179207   | -0.21657218    | -0.402385891   | -0.463784183   | -0.336571496   | -0.962018931    |
| 11     | -0.217429377  | 0.515262136   | 0.350856301   | -0.100672657  | 0.549929131   | 0.147763215    | 0.252868898   | 0.177859915    | 0.175597681    | 0.067257667    | -0.053329138   | -0.467271713   | 0.073008435     |
| 12     | -1.004970417  | -0.917919821  | -0.753789078  | -0.531443234  | -0.407053431  | -0.098799319   | -0.438978943  | -0.5576944     | -0.560414724   | -0.577745412   | -0.76836402    | -0.095561532   | -0.429937325    |
| 13     | 2.154362077   | 2.227339775   | 2.225443581   | 1.243769683   | 0.262403474   | 0.410830461    | -0.183527034  | -0.315294203   | -0.191988201   | -0.493801679   | -0.204983466   | -0.559583068   | 0.891983987     |
| 14     | 0.606452814   | -0.432630385  | -0.559889289  | 0.413660722   | -0.487113343  | -1.24838473    | 0.264202821   | 0.141167885    | -0.221164257   | 0.494970018    | 0.480579836    | -0.395926466   | -0.333468234    |
| 15     | -0.79792742   | -0.866038588  | 0.199754983   | -0.511033002  | 0.448996047   | -1.052603663   | 0.508057924   | -0.300435278   | -0.17681943    | -0.018709938   | -0.24351676    | -0.590345855   | -0.703033085    |
| 16     | -0.612377752  | -0.875797514  | -0.772196341  | -1.47521755   | -1.099927461  | -0.68294059    | -0.40347817   | -0.464217727   | -0.522331512   | -0.490098441   | -0.663873281   | -0.155297372   | -0.825728668    |
| 17     | -0.589463452  | -0.306595629  | -0.636499787  | 0.516159693   | 0.343158805   | -0.132212315   | -0.432446802  | 0.153040273    | -0.053081177   | 0.53031755     | 0.170176059    | 0.450948938    | -0.761435002    |
| 18     | -0.861009422  | -0.10734126   | 0.064520983   | 0.186953831   | -0.346532049  | 0.407676569    | -0.146789723  | -0.061936964   | 0.289547899    | 0.038192734    | 0.253720394    | -0.241475298   | -0.631258654    |
| 19     | -0.844839167  | -0.809624619  | -1.276193225  | -1.086474442  | -0.709134003  | -1.416235561   | -1.131589563  | -0.494383348   | -0.516569108   | -0.574592464   | -0.896636331   | -0.55438181    | -0.251943858    |
| 20     | -1.132299506  | 0.335451546   | -0.409628053  | -0.517705944  | -0.709397387  | 2.724671388    | 0.047032812   | -0.083428678   | -0.299669442   | 0.068319109    | 0.267647227    | -0.362670179   | -0.254925681    |
| 21     | -0.942737883  | -1.120278311  | -1.703702093  | -1.173541203  | -1.101821799  | 0.747271372    | -1.002625475  | -0.541602628   | -0.424957424   | -0.50230879    | -0.616200891   | -0.511030205   | -0.091053447    |
| 23     | 1.133809976   | 0.804432418   | 0.261869221   | 2.691399588   | 3.11058928    | 2.231744328    | -0.223869993  | -0.75208719    | 1.437843065    | -1.103111066   | -0.086397777   | -0.33829018    | -0.13009134     |
| 24     | 0.119760995   | -0.588696089  | -0.375290766  | -0.093030184  | -0.208719891  | 1.112764329    | -0.154402338  | -0.252749129   | -0.338674156   | 0.232167349    | 0.622406432    | 0.144060924    | -0.339836669    |
| 25     | 0.931467462   | 0.425581805   | 1.409368508   | 0.781745678   | 1.043723298   | 0.666986637    | -0.017303882  | 2.583356015    | 1.097057741    | 2.651922076    | 2.173607688    | 1.584223993    | -0.056897574    |
| 26     | 2.342722963   | -0.420053775  | 0.619837853   | -0.516912173  | -0.382379858  | -0.650944427   | -0.314307572  | -0.568604281   | -1.326755761   | -0.521248846   | -0.656803366   | -0.646006684   | -0.367709573    |
| 27     | 0.324394053   | -0.408270581  | 0.160371911   | -0.027866937  | 0.171596471   | 0.222226675    | -0.267666387  | 0.126678645    | -0.064951081   | 0.490234644    | 0.527206756    | 0.694142589    | -0.445218295    |
| 28     | 1.780360909   | 1.054409198   | 1.452570167   | 2.50006345    | 1.68747488    | 0.486322663    | 0.040459323   | -0.767826172   | -0.265168496   | -1.31960976    | -0.996611401   | -0.482164705   | -0.000404163    |
| 29     | -1.349560478  | 1.237465155   | -0.865759356  | 0.457407538   | 0.406190485   | -0.160814169   | 0.314017955   | -0.406577917   | 0.972464082    | -1.425433251   | -1.087797389   | 0.354780197    | 0.208068762     |
| 30     | -0.262190467  | -0.453400464  | -0.056938482  | -0.280546379  | -0.162993801  | 0.501028207    | -0.292990707  | 0.163838714    | 0.238519372    | 0.649800816    | 1.504133489    | -0.495536386   | -0.146790202    |
| 31     | 0.208916544   | 0.040723387   | 0.744523486   | 0.364702333   | 0.410171728   | 0.003120582    | -0.070798756  | -0.11184069    | 1.064582007    | -0.215530941   | 0.060795015    | -1.307660237   | -0.291770381    |
| 32     | 0.062594227   | -0.253808606  | 0.058621781   | -0.493617489  | -0.288835444  | -0.485031313   | -0.489344731  | -1.020344518   | 0.917525836    | -1.040113476   | -0.941554539   | -1.327081702   | -0.207343949    |
| 33     | -0.732552057  | -0.586635516  | -0.754138388  | -0.456368696  | -0.712261067  | -1.141142159   | -0.491631727  | -0.98875817    | -1.107638591   | -0.824827521   | -1.049148335   | -0.200321981   | -0.356493537    |
| 34     | -0.467894592  | -0.659517495  | -0.58992678   | -0.605708423  | -0.324385061  | -0.580862129   | -0.442918218  | -0.98137119    | -0.969592674   | -0.566121547   | -0.468150891   | -1.375323259   | -0.343489214    |
| 35     | -0.628330331  | -0.443067795  | -0.292392398  | -0.176407722  | -0.297152337  | -0.576743761   | -0.359658285  | -0.406830637   | -0.408153244   | -0.176477599   | -0.56504254    | -1.084423764   | -0.357129896    |
| 36     | -0.378474036  | -0.434013568  | -0.226662912  | -0.0806179    | -0.317024936  | -0.192013222   | -0.201860726  | 0.165914772    | -0.688273122   | 0.4449189      | 0.151767195    | 0.438325515    | -0.305359386    |
| 37     | -0.606941368  | -0.348313487  | 0.251723257   | -0.11013461   | -0.007799124  | -0.466675781   | -0.193695615  | 0.542652055    | 0.154687542    | 1.25857764     | 1.330671611    | 0.010496888    | -0.271320113    |
| 38     | -0.553890048  | -0.819655083  | -1.231224528  | -0.709717534  | -0.678189681  | -1.032882823   | -0.373603571  | 0.059608766    | -0.362953372   | 0.124379752    | -0.199295423   | 1.827224416    | -0.455068824    |
| 39     | -0.652005953  | -0.63623185   | -0.484901117  | -0.521658657  | -0.532979201  | -0.22090789    | -0.407032813  | -0.102153124   | -0.321788719   | -0.480599769   | -0.680723076   | -0.707625312   | -0.228699736    |
| 40     | -1.320806059  | -0.653997517  | -1.814842822  | -0.998535553  | -1.354589864  | 0.4097571      | -0.139352535  | 2.159110818    | 1.546280678    | 1.273425168    | 1.223258815    | 1.217826862    | -0.220147599    |
| 41     | -0.973693381  | -0.277597085  | -0.762852799  | -0.675723196  | -1.03014066   | 1.885885851    | -0.07916958   | 1.342574288    | 0.644971983    | 0.153830455    | 0.578275927    | 0.032831028    | 0.135724639     |

**Normalized Expression values of microRNAs associated with Lung Cancer (page 2)**

| sl No. | hsa-miR-29a-3p | hsa-miR-30c-2-3p | hsa-miR-33a-5p | hsa-miR-92b-3p | hsa-miR-1-3p | hsa-miR-23a-3p | hsa-miR-101-3p | hsa-miR-103a-3p | hsa-miR-197-3p | hsa-miR-135b-5p | hsa-miR-138-5p | hsa-miR-146a-5p |
|--------|----------------|------------------|----------------|----------------|--------------|----------------|----------------|-----------------|----------------|-----------------|----------------|-----------------|
| 1      | -1.112560133   | -1.019873686     | -0.237167515   | 0.821124304    | 0.055546898  | 0.542789883    | -0.622756764   | -1.053955861    | -0.031402837   | 1.340486754     | -0.536256292   | -1.168414854    |
| 2      | -1.537676744   | -0.531691279     | -0.560733236   | -0.564995034   | 1.063766079  | 0.687076786    | -0.273899669   | -0.753381806    | -1.875700345   | 0.071428677     | -0.830001294   | -1.307049783    |
| 3      | 0.159494922    | -0.408877578     | -0.393260368   | 1.97683621     | -0.47623079  | 0.534876128    | -0.875744582   | -0.306861033    | 1.358555079    | 0.605288094     | -0.502607713   | -0.108824417    |
| 4      | 0.173076768    | -0.680595355     | -0.159885993   | 0.729533512    | 0.211863693  | -0.537982009   | -0.621493652   | -0.116825094    | 0.942071433    | -0.661967229    | 2.134188345    | 1.964707925     |
| 5      | 0.23985443     | 2.761319309      | -0.647515529   | 1.30915348     | 0.407544021  | 0.333298148    | 1.34076651     | -0.351714428    | 1.04598292     | -1.137482974    | -0.250228549   | 1.317688173     |
| 6      | 1.69194443     | -0.047588608     | -0.888706175   | 0.422246521    | -0.162186464 | 0.65390693     | -0.035956404   | 0.057878777     | 0.127894596    | -0.676999265    | -0.656359036   | 0.096738725     |
| 7      | -1.120320245   | 0.269580187      | 2.207958795    | -0.038078681   | -1.001226044 | -0.377480832   | -0.114006969   | -1.012613995    | -0.814139843   | 0.072286355     | 2.621055156    | -0.414571834    |
| 8      | -1.205563732   | 1.405565319      | -0.696422272   | 0.475386976    | 2.182176398  | 1.009864088    | 2.641854416    | -0.91294063     | -0.567561404   | -1.195062376    | -0.342569309   | -1.275637951    |
| 9      | -0.095862257   | -0.994298668     | 1.779135374    | -0.37943795    | -1.179804284 | -0.259772714   | -0.917310674   | 1.322838564     | 0.979218816    | -0.951856332    | -0.728038388   | -0.52305249     |
| 10     | 0.780546121    | 0.964057821      | -0.491850311   | -0.735290053   | 0.254568148  | -1.240640327   | 0.40577618     | -0.29712647     | -0.281051286   | -0.581850599    | 1.573457549    | 0.070794044     |
| 11     | 0.105841108    | 0.638915224      | 0.008794278    | 1.162886025    | -0.555289375 | 1.637062294    | -1.078156176   | 0.212973568     | 2.149802418    | -0.682065035    | 1.189096648    | 0.324058137     |
| 12     | -0.103293412   | 0.570921343      | 0.014413934    | 1.29884837     | 0.731071302  | -0.243575769   | 1.047351008    | 1.569172793     | -0.235863737   | 1.382679685     | -0.664200425   | -0.384549785    |
| 13     | -1.440553542   | -0.095857643     | 2.600419216    | -0.715626387   | 2.224975796  | 1.052707634    | -0.580284436   | 1.217184045     | 0.700637854    | -0.411397509    | -0.603035155   | -1.263795825    |
| 14     | 1.173458491    | -0.424983426     | 0.225327335    | -1.392952484   | 0.981173598  | -0.905451093   | -0.090056427   | -0.372106945    | -1.188152526   | 0.382184527     | 0.006017639    | -0.122100647    |
| 15     | -1.003729117   | -0.73808177      | 0.408714028    | -1.434430064   | -0.574448693 | -0.687609043   | 0.134939844    | 2.672381419     | -1.161778196   | 2.206881733     | -0.877715976   | -0.386216172    |
| 16     | -0.78755616    | 1.435208435      | -1.014067118   | -0.530116629   | 0.098536014  | -0.808548638   | 0.455913946    | 0.178082274     | -0.334531894   | -0.986553316    | 0.09681932     | -0.748078111    |
| 17     | 1.413790189    | -0.789821772     | -0.667969335   | -1.448804181   | -0.690545439 | -0.509422533   | 0.082892422    | -0.726303248    | -0.010015806   | -1.231988875    | -0.308669589   | 1.289033108     |
| 18     | 0.716741821    | -0.423575037     | 0.188494723    | -0.805390438   | -1.069387523 | -0.772366772   | -0.308580318   | -0.660117857    | 0.474849044    | 0.955455798     | 0.005592821    | 1.539032868     |
| 19     | -0.164345329   | -0.954363615     | -0.404344116   | -0.862665535   | -1.110552122 | -1.590849189   | -0.895845347   | -0.859506947    | -0.96658152    | 0.671678973     | -0.420334951   | 1.300920167     |
| 20     | 1.385206355    | -1.089547017     | -0.708949883   | 0.050401356    | -1.058018618 | 2.333387857    | -1.397737572   | 0.923532326     | 0.669782157    | -0.360801459    | -0.297413284   | 0.575901429     |
| 21     | 0.731506036    | 0.153587817      | -0.562385833   | 0.661370681    | -0.333532595 | -0.851270829   | 1.702334664    | -0.730589452    | -0.982014924   | 1.189654372     | -0.608797516   | -0.776582707    |
| 23     | -1.242623937   | -0.78800319      | -0.220086026   | 0.154389453    | 1.847651212  | 2.950985903    | 0.749926127    | -1.041830383    | -0.297092876   | 0.299281066     | -0.355754101   | -1.105614476    |
| 24     | 1.001519036    | 1.13214768       | -0.299249095   | 2.380836193    | 2.498219985  | -0.097130612   | 1.674287727    | 0.127120811     | -0.256274999   | 0.013207237     | -0.238801829   | 0.400739261     |
| 25     | 2.321842361    | 1.161406677      | -0.229697242   | 1.476667758    | 0.329400136  | 0.253213565    | 0.87741397     | -0.320581672    | 0.97137774     | 0.19129915      | 0.243822526    | 2.099714126     |
| 26     | 0.496600689    | 0.199131489      | -0.338757842   | 1.685340526    | 2.056076756  | -0.424069168   | -0.061575366   | -0.678233756    | -0.663314001   | -0.885018576    | -0.328909975   | 0.102510871     |
| 27     | 0.153056994    | -0.652939519     | -0.321520088   | -0.885256952   | -0.823856782 | -0.563783795   | -0.076936062   | 0.853935145     | -0.403913804   | 0.184193123     | 0.168462388    | 1.452695286     |
| 28     | -0.782024325   | 1.902628806      | -0.176417205   | -0.21011361    | -0.077117025 | 2.018116343    | -0.388017532   | 2.179524332     | -0.44063507    | -0.769845806    | -0.136608809   | -1.03661067     |
| 29     | -2.152333104   | -2.046071018     | 0.322954539    | -1.204232721   | -1.01368098  | -0.277085629   | -2.139304495   | -2.300577865    | -1.281239639   | -1.493074416    | -0.684380785   | -1.122920046    |
| 30     | 1.165666653    | -0.062945185     | -0.159560925   | 0.09291178     | -0.21723317  | -0.059974862   | 1.127159447    | -0.116039333    | -0.201700602   | 0.582079323     | -0.247177873   | -0.066071623    |
| 31     | -0.288070077   | 1.03476597       | -0.248491701   | -0.153576712   | -0.552270351 | -0.103395234   | -0.780540914   | 0.034130722     | 0.553713958    | 0.755946384     | 0.237216187    | -0.256855939    |
| 32     | -1.015958383   | -0.143701663     | -0.32093097    | -0.531411197   | -0.594785302 | -0.565728768   | -1.800721023   | -1.332561202    | 0.109075229    | -0.840554398    | -0.445097254   | -0.663938516    |
| 33     | -0.390379864   | 0.001248576      | -0.308819201   | -0.875271396   | -0.526841715 | -0.757601774   | -1.000955268   | -0.958582717    | -0.566113289   | -1.31086184     | -0.257955271   | -0.761819745    |
| 34     | 0.105700471    | -0.360383473     | -0.202071058   | -0.079496117   | 0.061686792  | 0.427445162    | 0.573223541    | 0.112966221     | -0.331248558   | 0.543631331     | -0.296097036   | -0.663297483    |
| 35     | 0.112198185    | 0.138173341      | -0.187150204   | -0.917426275   | -0.214383314 | -0.427993061   | 0.10251089     | 0.542872967     | -0.425016931   | 0.209975461     | -0.334932744   | -0.215716454    |
| 36     | 0.274867843    | 0.554054952      | -0.269957353   | 0.185968719    | 0.49187409   | -0.529418451   | 0.504550103    | 0.757147968     | -0.425420627   | -0.622683157    | -0.149690789   | -0.235076932    |
| 37     | 0.442086641    | 0.787726197      | -0.207618987   | -0.471609198   | -0.294361979 | -0.70607083    | 0.669124825    | 0.011390908     | -0.161670947   | 0.405070398     | -0.371826994   | 0.793088986     |
| 38     | -0.648745523   | -1.028318345     | -0.363449674   | -0.808168332   | -0.630285344 | -0.89957523    | -0.513739402   | -0.612131317    | -0.60128562    | -0.917181717    | -0.481226934   | -0.058098813    |
| 39     | 0.283516702    | 0.460404847      | -0.252805076   | -0.407175938   | -0.791203735 | -0.245897859   | -0.253641687   | 0.734778209     | -0.230545011   | -0.099878361    | -0.317544782   | 0.244708032     |
| 40     | 0.087135362    | -0.716242603     | -0.233034656   | 0.896790532    | -0.770046494 | 0.022260396    | 0.4453385      | 0.27246806      | 0.563688741    | 0.453558568     | -0.094570135   | -0.625044685    |
| 41     | 1.066306019    | 0.282223442      | -0.189529074   | 0.87122927     | -0.301449919 | 1.143410608    | 1.239749231    | 1.357401442     | 0.431399232    | 0.149894842     | -0.037852478   | -0.651258691    |

**Additional File 4: Normalized Expression values of microRNAs associated with Lung Cancer (page 3)**

| sl No. | hsa-miR-148a-3p | hsa-miR-153-3p | hsa-miR-186-5p | hsa-miR-187-3p | hsa-miR-194-5p | hsa-miR-199b-3p | hsa-miR-200a-3p | hsa-miR-210-3p | hsa-miR-215-5p | hsa-miR-21-5p | class |
|--------|-----------------|----------------|----------------|----------------|----------------|-----------------|-----------------|----------------|----------------|---------------|-------|
| 1      | -0.370505652    | 0.770326026    | 0.073080614    | -0.360075992   | -0.286735917   | 0.902799997     | -0.155925997    | -0.748157192   | -0.204719275   | -0.408091815  | LT    |
| 2      | 0.034633969     | 0.4929166      | -1.56851209    | -0.54741329    | -0.294286658   | 0.073549556     | -0.452595542    | -1.200453377   | -0.19758667    | -0.004876541  | LT    |
| 3      | 0.033335939     | 0.123245969    | -0.173481398   | 1.293846446    | -0.293471398   | 1.995147595     | -0.112868245    | 0.00808047     | -0.205727759   | 0.254581654   | LT    |
| 4      | -0.463463296    | -0.639781954   | 1.855235849    | -0.268528108   | -0.226397518   | 0.113525649     | 0.471398614     | 1.692171864    | -0.213835264   | 0.089115111   | LT    |
| 5      | -0.608744033    | -0.699624518   | 0.482860659    | -0.21161262    | -0.025222232   | -0.667286761    | -0.325915893    | -0.730859641   | 0.035347549    | -0.98252079   | LT    |
| 6      | -0.746239052    | -0.985852278   | 0.21503894     | -0.52955615    | -0.180094468   | 0.313708264     | 0.397885946     | 0.495469752    | -0.257277431   | 2.189204589   | LT    |
| 7      | 1.146325418     | -0.632473301   | -1.109257816   | 1.180043173    | -0.296589054   | -0.796583219    | -0.321559566    | -0.02443012    | -0.238626275   | -0.717293452  | LT    |
| 8      | -0.482309299    | -0.302688154   | -1.265844403   | -0.494796887   | -0.300839332   | 0.100664938     | -0.722736598    | -1.189487265   | -0.229748017   | -0.705357518  | LT    |
| 9      | -0.430198774    | 1.896755656    | 1.559517355    | -0.049175015   | -0.24957602    | -0.630855687    | 4.114549877     | 1.58761492     | -0.214668055   | -0.588829282  | LT    |
| 10     | 0.524497767     | -0.941362905   | -0.485059      | -0.449198548   | -0.280114899   | -1.175868556    | -0.21779766     | -0.509377936   | -0.271914649   | -0.214988804  | LT    |
| 11     | -0.352443625    | -0.575479517   | 1.020525596    | -0.367986644   | -0.276538985   | 2.453422978     | -0.355015537    | 1.320975184    | -0.211432774   | 0.635844885   | LT    |
| 12     | -0.527303839    | -0.036174665   | -0.965763706   | 3.713012703    | -0.287843108   | -0.710093369    | -0.356952216    | 1.411179384    | -0.204626      | -0.365516568  | LT    |
| 13     | -1.212159838    | 1.063088924    | 0.436320625    | 0.039092044    | -0.272111905   | 0.11578643      | 0.120312436     | -1.079426868   | -0.214072256   | -0.548071331  | LT    |
| 14     | -0.308093471    | -0.509146819   | 0.063109675    | -0.466636935   | 0.382809665    | -0.692167756    | 0.406293046     | -0.942607844   | -0.265852404   | -0.465545718  | LT    |
| 15     | -0.788811888    | -0.636468039   | -0.188895972   | 0.379305099    | -0.17074884    | 0.870992587     | -0.162057559    | 1.273130859    | -0.246778779   | 1.310996258   | LT    |
| 16     | 2.201454361     | -0.867671103   | -0.947579918   | -0.44161867    | -0.280879496   | -1.089193841    | -0.547979694    | -0.843710064   | -0.231834544   | -0.752365826  | LT    |
| 17     | -0.255140951    | -0.383251762   | 1.311439855    | -0.523285639   | -0.150436668   | -0.735421428    | -0.608337256    | -0.875595205   | -0.226912583   | -0.582216922  | LT    |
| 18     | 0.577636422     | -0.474092391   | 0.490348089    | -0.521318772   | -0.255258705   | -1.154356063    | -0.291431584    | -0.586906542   | -0.261199123   | -1.039538172  | LT    |
| 19     | 2.897822749     | 1.30344917     | -0.678171067   | -0.436532151   | -0.284596588   | -0.643280696    | -0.379965473    | 0.828038897    | -0.269440629   | -0.825429308  | LT    |
| 20     | -0.210052367    | -0.608072989   | 1.110721858    | -0.436569605   | -0.284295556   | 0.519410582     | -0.553848872    | -0.285210047   | -0.224917034   | 2.202840535   | LT    |
| 21     | -0.660240539    | 2.642358051    | -1.235633743   | -0.50099444    | 4.313227684    | 0.836098798     | 0.054547772     | 0.399560771    | 4.355821974    | 1.518059016   | LT    |
| 23     | 0.487443381     | 0.977741563    | -0.31703498    | -0.95813756    | -0.224801443   | 3.202831184     | -0.230578072    | -1.075674396   | 0.04633639     | -1.555966679  | LNT   |
| 24     | 0.443656485     | 0.493475079    | -0.281680402   | 2.940855543    | -0.192489998   | 0.970811821     | 0.659512242     | 0.765026874    | -0.027041102   | -1.127152163  | LNT   |
| 25     | -0.038307173    | -0.197421395   | 0.274949875    | 1.064917613    | 1.386156612    | 0.067613177     | 0.933385847     | 1.674139089    | -0.772721756   | -1.078894556  | LNT   |
| 26     | -0.241032387    | -0.806297844   | -0.346791028   | 1.097673301    | -0.438935658   | 0.02004412      | 2.616398993     | 0.40749931     | 0.413467844    | 0.158994992   | LNT   |
| 27     | -0.898649576    | -1.069260384   | -0.16902678    | -0.468104637   | -0.159128172   | -0.337382244    | -0.1748802      | 0.265761691    | -0.857407795   | 0.18760394    | LNT   |
| 28     | 1.844455032     | -0.110134632   | -0.009413827   | -0.952396805   | 0.13639744     | 1.523318432     | 0.697970907     | -0.903179842   | 0.424893833    | -1.450815555  | LNT   |
| 29     | -1.189441849    | -0.967881299   | -0.683762375   | -1.213432076   | 1.673294255    | -0.664960778    | -0.554753266    | -1.453640157   | 0.604698793    | 1.918116404   | LNT   |
| 30     | 0.434843416     | 0.128306579    | -0.00353977    | 0.969729673    | -0.441905083   | -0.320187083    | 1.264966301     | 2.492689569    | -0.768331953   | -0.601115592  | LNT   |
| 31     | 0.52545702      | 0.298562903    | -0.180567919   | -0.210493456   | -0.70160081    | -0.287925616    | 0.89553438      | 0.349204512    | -0.514370541   | 0.275506257   | LNT   |
| 32     | -1.301033303    | -0.691223184   | -0.188022025   | -0.744190361   | -0.780096096   | -0.689275817    | -0.7140345      | -0.085447512   | -0.805338284   | 1.794331451   | LNT   |
| 33     | -1.780111623    | -0.489251835   | -0.363936346   | -0.639487377   | -0.657190434   | -0.992187847    | -0.883824399    | -0.28402896    | -0.761432634   | 1.492004472   | LNT   |
| 34     | 0.300753679     | 0.476919353    | -0.247887402   | 0.148210811    | -0.963800206   | 0.534759621     | 0.480016653     | 0.546007402    | 0.166931583    | -0.140730427  | LNT   |
| 35     | 0.660365724     | -0.749370791   | -0.247408984   | -0.568253761   | -0.658212151   | 0.112218921     | 0.063819665     | -0.322383971   | -0.326148111   | -0.026256362  | LNT   |
| 36     | -0.720570941    | 0.184355533    | -0.256442601   | 0.173777808    | -0.204203369   | -0.24894494     | -0.241905451    | 0.245520146    | -0.516802694   | -0.098201205  | LNT   |
| 37     | 0.482505899     | -0.128633114   | -0.152982355   | -0.552113402   | -0.107490627   | -0.605662003    | 0.333588209     | 0.719356426    | -0.600128001   | -0.293471121  | LNT   |
| 38     | -0.779348242    | -0.842805953   | -0.410481544   | -0.860311956   | -0.277548882   | -0.330385061    | -1.090833134    | -0.782411394   | -0.415431305   | 1.067069454   | LNT   |
| 39     | 1.351245782     | 0.923352392    | -0.182597257   | 0.170538779    | -0.705990519   | -0.616881323    | -0.372597231    | -0.476000207   | 0.0600582      | 0.132648525   | LNT   |
| 40     | -0.154972867    | 1.809543154    | -0.369580163   | -0.57974493    | 0.410320763    | -0.194831361    | -1.223509775    | -0.553890694   | -0.075994636   | 0.269664997   | LNT   |
| 41     | 1.638242733     | 2.408644893    | -0.032292608   | 0.77185358     | -0.255378936   | 0.25457486      | -1.117467039    | 0.122414321    | 1.187789312    | -1.029794362  | LNT   |
