# Supplementary material for: An approach to forecast human cancer by profiling microRNA expressions from NGS data
Source: Springer Nature journal article supplement (doi:10.1186/s12885-016-3042-2), 2017-01-25
Supplement: MOESM5 [file 12019118]

**Additional File 5 : Normalized expression values of microRNAs associated with hepatocellular carcinoma (page 1)**

| sl No. | hsa-let-7c-5p | hsa-let-7d-5p | hsa-let-7e-5p | hsa-miR-18a-5p | hsa-miR-23a-3p | hsa-miR-27a-3p | hsa-miR-29a-3p | hsa-miR-30a-5p | hsa-miR-100-5p | hsa-miR-16-2-3p | hsa-miR-197-3p | hsa-miR-148a-3p | hsa-miR-30d-5p |
|--------|---------------|---------------|---------------|----------------|----------------|----------------|----------------|----------------|----------------|-----------------|----------------|-----------------|----------------|
| 1      | -1.123849874  | -1.128343388  | -0.612404743  | -0.230745355   | -0.577382881   | -1.021345407   | -1.237322708   | -0.984008581   | 1.322353714    | 1.555042216     | 3.948078464    | -0.733853891    | 1.157513371    |
| 2      | -0.478249649  | -1.243131257  | -0.72023508   | 0.103927957    | -0.90284509    | -1.264398659   | -0.611543303   | -0.8853681     | -1.249406182   | 0.755262181     | -0.498096324   | -0.040770931    | 1.206290468    |
| 3      | 0.037586167   | -0.568681259  | -0.070552225  | -0.458478227   | 0.105223194    | 0.971339597    | 0.057053357    | 0.223834977    | -0.638296541   | -1.076690506    | -0.593462605   | -0.106676312    | -0.806468927   |
| 4      | 0.600804261   | -0.366730699  | -0.505784581  | -0.420768463   | -0.603298663   | -0.106139142   | -0.307429844   | -0.205129379   | 0.313989358    | -0.522913724    | -0.426653554   | 0.146813299     | -0.111402435   |
| 5      | -1.221029218  | -1.059137316  | -0.917958168  | -0.201961313   | -0.92968925    | -1.183031034   | -1.265724079   | -0.499327046   | -1.245568169   | -1.536183049    | -0.682397838   | -0.578674092    | -1.21994264    |
| 6      | -1.221910947  | 0.547037859   | -0.083407142  | 0.122679933    | 0.22401149     | 2.466272541    | 3.513696483    | 0.769695984    | -1.103396956   | -0.534493675    | -0.4555711     | -1.247653614    | -0.239131602   |
| 7      | -1.442887366  | -0.985527458  | 0.574755207   | 4.244634036    | -0.14113547    | 0.405559313    | -0.832858084   | -0.812008785   | -0.971603458   | 1.067864285     | 1.585355661    | -0.87392824     | -0.106527482   |
| 8      | 0.770657113   | 0.630647108   | 1.665529799   | -0.311376103   | 2.220995793    | 0.63994556     | 0.604198604    | 0.473475824    | 0.760358671    | -0.080801917    | 0.131364585    | -1.122508626    | -0.842650059   |
| 9      | 0.095787432   | -0.072957999  | -0.146768713  | -0.375309846   | -0.358917575   | 0.485798457    | -0.185601682   | -0.080842137   | -0.147015254   | -0.704857212    | -0.553104922   | -0.175716304    | -0.838172486   |
| 10     | -0.227867959  | -0.289940208  | -0.858731158  | -0.212764641   | -0.889710875   | -1.159108295   | -0.123113769   | -0.326682061   | -0.56923519    | 1.170856691     | -0.582620835   | 0.685757379     | 0.257641134    |
| 11     | 1.085376046   | -0.033429415  | -0.745259268  | -0.44443923    | -0.756628755   | -1.297385296   | -0.352636946   | -0.619115793   | 1.491183979    | 0.09102947      | -0.385139794   | 1.728134082     | 1.372353838    |
| 12     | 1.264714715   | -0.394630051  | -0.722604884  | 0.186862313    | -0.567411462   | 1.1679208      | -0.085574133   | 3.822452114    | -0.340751467   | 1.674716609     | -0.347451502   | 1.71425906      | -0.407309443   |
| 13     | 0.819160359   | 0.407687945   | 1.231935304   | -0.392397987   | 0.736298006    | 0.721410791    | 0.506332148    | 0.592724625    | 1.276646513    | -0.749945934    | -0.052211474   | -1.051783887    | -0.750592596   |
| 14     | -0.860732087  | -0.92221602   | -0.100237515  | 0.011116719    | -0.032197499   | 0.321888348    | -0.492535895   | 0.150756997    | -1.220971898   | 0.776259065     | -0.564829888   | 0.522294688     | -0.067436774   |
| 15     | -0.391025184  | 1.665843857   | 0.025804489   | 1.173575471    | 0.029885968    | 1.058895805    | -0.349225884   | 0.006891519    | -0.497241616   | 0.544684744     | -0.135874858   | 0.043859752     | 0.756353847    |
| 16     | 2.326033139   | 2.32035265    | 3.115025517   | -0.489308189   | 2.749425531    | 0.315989393    | -0.132038135   | -0.350002951   | 2.168976639    | 1.274685384     | 0.557746723    | -1.429863122    | -0.614029342   |
| 17     | 0.069048187   | -0.603540324  | -0.539962411  | -0.371605736   | 0.289645051    | -0.145962156   | 0.605477478    | 1.004777685    | -0.14877697    | -1.029896846    | -0.551725679   | 0.880279927     | -0.915889938   |
| 18     | 1.317055292   | -0.217924564  | -0.854262766  | -0.502425      | -0.814995564   | -1.357773908   | 0.535647336    | -0.64038009    | 0.434677021    | 0.129877304     | -0.512230378   | 1.442664554     | 0.014553896    |
| 19     | -0.840728103  | -0.543134833  | -0.208229899  | -0.412478244   | -0.751493117   | -1.059170332   | -1.188072123   | -0.707157698   | -0.87701005    | -1.556777393    | 0.098173081    | -0.062685769    | -0.559946579   |
| 20     | -0.336891716  | -0.321906736  | -0.499944226  | -0.520682978   | -0.281875433   | -0.418156545   | -0.328365229   | 0.343924456    | 0.624865424    | -0.013730666    | -0.061619172   | 0.172855586     | 0.67480087     |
| 21     | -0.853146433  | 0.090592227   | -0.826789157  | -0.29570106    | -0.812357358   | -0.201499362   | 0.689234206    | -0.402453732   | -0.136658362   | -1.568340673    | -0.112170072   | 1.809880071     | -0.557895486   |
| 22     | 1.079764871   | 0.865632775   | 1.220073869   | -0.454688074   | 1.536082649    | -0.148079533   | -0.231711154   | -0.08993135    | 1.23166148     | 0.200609182     | 0.4501321      | -0.933352004    | -0.524026207   |
| 23     | -0.467669046  | 2.223437108   | 0.580007749   | 0.252334017    | 0.52837131     | 0.807029062    | 1.212113356    | -0.786126479   | -0.478780685   | 0.133744463     | -0.255690619   | -0.789331606    | 3.121914574    |
| 24     | 1.17359675    | 1.219570072   | 1.758366749   | -0.615704958   | 0.888438447    | 1.545860479    | 0.552463846    | 0.790655061    | 1.288876801    | 0.1907538       | 1.192332499    | -0.516611767    | 1.817983975    |
| 25     | -0.374750813  | -0.659646201  | -0.978787418  | 0.608821886    | -1.219829506   | -0.724544359   | -0.744185049   | -0.266958882   | -1.344447811   | 0.271144567     | -1.444902951   | -0.103885291    | -2.039324275   |
| 26     | -0.730566681  | -0.87841097   | -0.744106254  | 0.327910593    | -0.79176502    | -1.137067148   | -1.036673723   | -1.01653697    | -0.832466992   | -0.893102706    | -1.392199748   | 0.573389922     | -1.02978841    |
| 27     | 0.729237477   | 0.135120287   | 0.757626286   | -1.327445621   | 0.17031273     | 1.28355357     | -0.750678586   | -0.639012937   | 1.159053576    | -0.270614649    | 1.235237256    | -0.545415786    | 0.189652874    |
| 28     | 0.043668195   | 0.514194838   | 0.801845121   | -0.248274292   | 0.593031826    | 0.447540102    | 1.011265124    | -0.645121521   | 0.140995325    | 1.49526898      | 0.787129827    | -0.737859228    | -0.181344725   |
| 29     | -0.592960633  | -0.88638393   | -1.000372395  | -0.147415007   | -0.880366796   | -1.000676377   | -0.521632262   | 0.151474389    | -1.08123206    | -1.309961217    | -0.956613199   | 1.626467066     | -0.039558673   |
| 30     | -0.498203166  | -0.617978669  | -1.175199157  | 0.427221114    | -1.399009067   | -0.701349603   | -2.104179958   | -0.595942619   | -1.626329846   | -0.697239995    | -1.670813189   | -0.676692903    | -2.057801763   |
| 31     | -1.860641179  | -1.49786954   | -0.83918341   | 2.562952345    | -0.679223268   | -0.585229402   | 0.260437006    | -0.511553738   | -0.101166955   | 1.030447184     | 0.212250893    | -0.015778479    | 0.278714632    |
| 32     | 0.082690293   | 0.083343271   | 0.12008203    | -0.415248531   | -0.181058821   | 0.393287029    | -0.369795482   | -0.772373328   | 0.901855888    | -1.280923101    | -0.822218971   | -0.009217245    | -0.1165337     |
| 33     | -0.501309572  | -1.089659168  | -1.084869778  | -0.438319944   | -1.003801198   | -1.251688799   | -1.371009644   | -0.141621704   | -0.649779604   | -1.328830353    | -0.541552758   | 2.046923168     | -0.372424103   |
| 34     | -0.326974018  | -0.442231525  | -0.549241832  | 0.434913598    | -0.577643481   | 2.074840912    | 0.001149919    | 3.157362169    | -0.254234952   | 0.265471364     | 0.370155107    | 2.135883455     | 1.457810959    |
| 35     | -0.204322704  | -0.632597386  | -0.1859548    | -0.71598069    | -0.089696921   | 0.288818286    | -0.224942415   | 0.00937315     | -0.405504348   | -1.816095764    | -0.21332041    | -0.737212999    | -0.675548878   |
| 36     | -0.410962949  | 0.258306193   | 0.03670864    | 0.164510644    | 0.187522061    | -0.126781164   | 1.044205927    | -0.078934601   | 0.438546063    | 0.153254615     | -0.691118022   | -0.752656254    | -0.036377979   |
| 37     | -0.536440707  | -0.673149827  | -0.786197555  | 0.725013757    | -0.45777357    | -1.001321311   | 0.797042564    | 0.769568397    | -1.041536174   | -0.373426552    | -0.614915447   | 1.541825259     | 0.199471467    |
| 38     | -0.302490307  | -0.032398064  | -0.436317265  | 1.354217699    | 0.060794488    | 0.672051676    | 1.110956901    | 1.666034113    | -0.205874349   | 0.609351031     | -0.033185296   | 0.203349067     | 1.000812547    |
| 39     | -0.733473665  | -0.104782037  | -0.22156893   | 1.897955077    | -0.270612282   | 0.135017388    | 2.409780436    | 0.443409753    | 0.182512276    | -0.602396531    | 0.095725852    | -0.48031777     | 0.245651779    |
| 40     | -0.194562491  | -0.213179824  | -0.28733574   | 0.074732123    | 0.133036476    | 0.071429521    | -0.008917858   | -0.468712137   | -0.723445893   | 1.172683383     | -0.695232586   | -0.244278121    | -0.086651395   |
| 41     | 2.376059725   | 2.596077212   | 1.76243685    | -1.189882124   | 1.622801926    | -0.344122176   | 0.731476804    | 0.925618699    | 2.064381182    | 1.626638943     | 2.136360926    | -0.65096728     | 1.6227305      |
| 42     | 2.573425012   | 2.172368558   | 2.337426244   | -0.965119229   | 2.643304964    | 1.909699011    | 0.58358007     | -0.036648773   | 0.509353492    | 1.55023116      | 0.499662658    | -1.256160868    | -0.370313311   |
| 43     | 0.06451261    | 0.698764772   | 0.419746966   | -0.961176776   | 0.926667209    | -0.088333867   | -0.030233991   | -0.708266378   | 0.862511482    | 0.552113462     | 0.527117743    | -0.718889164    | 1.052352497    |
| 44     | -0.399956327  | -0.359656691  | -0.498657332  | -0.836535381   | -0.902459158   | -0.947844959   | -0.441896417   | -1.070617637   | -0.821532966   | -0.001416393    | 0.905072313    | 0.409444779     | -0.455382538   |
| 45     | 0.62442515    | 0.410198629   | 0.793552981   | -0.717146284   | 1.227328962    | -0.913138808   | -0.898213215   | -0.961194504   | 1.539465866    | -0.343351227    | 1.115027503    | -1.091339561    | -0.404131479   |
| 46     | -0.611137408  | -1.011521932  | -1.112339612  | -2.043163591   | -1.234117955   | -1.176473971   | 0.18501654     | -1.191242878   | -0.901389793   | -1.139807519    | -0.222662107   | 1.114490531     | 0.288807497    |

Additional File 5 : Normalized expression values of microRNAs associated with hepatocellular carcinoma (page 2)

| sl No. | hsa-miR-34a-5p | hsa-miR-182-5p | hsa-miR-183-5p | hsa-miR-199b-5p | hsa-miR-199b-3p | hsa-miR-204-5p | hsa-miR-210-3p | hsa-miR-217  | hsa-let-7g-5p | hsa-let-7i-5p | hsa-miR-30b-5p |
|--------|----------------|----------------|----------------|-----------------|-----------------|----------------|----------------|--------------|---------------|---------------|----------------|
| 1      | -0.670543015   | -0.087152191   | -0.142179923   | -0.61403809     | -0.71636429     | 0.176846817    | 1.574820255    | 1.603379156  | -1.818953904  | -1.048499028  | 0.56691225     |
| 2      | -1.279234698   | -0.336745138   | -0.255033727   | -0.585733736    | -0.660911202    | -0.475467806   | -0.644307321   | 2.073498136  | -1.617732686  | -0.933561973  | 0.107783667    |
| 3      | -0.440297145   | -0.324098613   | -0.323351671   | -0.164702244    | 0.164048479     | -0.471562885   | -0.43970637    | 0.541541709  | -0.427325056  | -0.190579032  | -0.676927941   |
| 4      | 1.297241606    | -0.598768214   | -0.58325441    | -0.555336732    | -0.549024404    | 0.624492961    | -0.294218496   | -0.606220326 | -0.236037576  | -0.555737244  | -0.205631293   |
| 5      | -0.312557148   | 0.03025018     | 0.023566224    | -0.619762061    | -0.733287392    | -0.55305957    | -0.170096662   | -0.595138298 | -1.600876368  | -0.875208275  | -1.418197484   |
| 6      | 0.754083406    | -0.405171035   | -0.382431897   | -0.056171302    | -0.112655817    | -0.529137099   | 0.119103611    | 0.107320272  | 1.050622475   | 0.854554314   | -0.116557369   |
| 7      | -0.100714694   | -0.061521986   | -0.090986608   | -0.238280671    | -0.661841302    | -0.591414814   | 2.74082736     | -0.569175298 | -1.372531808  | -0.189589155  | -0.431977243   |
| 8      | -0.513901068   | -0.392543811   | -0.468470235   | 0.512078226     | 2.210151868     | -0.290665039   | -0.325748346   | -0.556263671 | 1.254955165   | 0.586749491   | 0.891866565    |
| 9      | -0.796115458   | -0.228921702   | -0.314709772   | -0.199381833    | -0.174254749    | -0.388074253   | -0.298884723   | 0.162152396  | 0.254167726   | 0.142967012   | -0.69299846    |
| 10     | -1.010580198   | 0.514390034    | 0.44846563     | -0.614322649    | -0.717625086    | -0.461399429   | -0.283522065   | -0.580350031 | 0.400761067   | -0.681577886  | -0.343917911   |
| 11     | -0.143725852   | -0.572421291   | -0.560125484   | -0.618716223    | -0.700038562    | 0.757844853    | -0.46224822    | -0.586890935 | 0.024050925   | -0.884041746  | 3.057593454    |
| 12     | 0.345368729    | 3.543215113    | 2.626042016    | -0.608867478    | -0.554209487    | -0.412841326   | 2.956905831    | 1.339916898  | -0.10489716   | 0.022889289   | -0.871869691   |
| 13     | -0.230618006   | -0.454543766   | -0.469482594   | 0.830236944     | 1.577285488     | -0.273329937   | -0.385935323   | -0.515768494 | 0.831757799   | 0.71777601    | 0.056556666    |
| 14     | -0.593227446   | -0.574800383   | -0.552479604   | 0.198232335     | -0.118069197    | -0.513579886   | -0.127055051   | 2.852305895  | -1.255620319  | -0.743172368  | -0.371991023   |
| 15     | -0.571647465   | 0.183606983    | 0.342158963    | 1.04406798      | 0.010692678     | -0.489867015   | -0.368705524   | -0.185765498 | 0.367618443   | 0.97676371    | 0.827717814    |
| 16     | -0.784660338   | -0.310373122   | -0.401074704   | 1.661182985     | 2.735160778     | 0.127754476    | -0.587390462   | -0.54877327  | 1.370768375   | 0.150210199   | -0.046315442   |
| 17     | -0.106493569   | -0.579219592   | -0.566062471   | -0.563957071    | -0.26108176     | -0.605358037   | -0.436849751   | -0.570587044 | -0.327947707  | -0.316299405  | -0.994961059   |
| 18     | 1.486158257    | -0.536903964   | -0.495700773   | -0.614424713    | -0.721910247    | 2.996565966    | -0.597325258   | -0.605207812 | 0.444344224   | -0.26235465   | -0.361170938   |
| 19     | -0.02922192    | -0.309748093   | -0.279134166   | -0.60067132     | -0.711692055    | 2.89259423     | -0.49736414    | -0.599184042 | -0.369554574  | 0.041578785   | -1.36584175    |
| 20     | 1.749603719    | -0.127782769   | -0.140998234   | -0.488357888    | -0.455596432    | -0.493930149   | -0.467871748   | -0.499758587 | 1.34994347    | 0.008073467   | -0.120918361   |
| 21     | 2.833365135    | -0.386315288   | -0.356165311   | -0.615183394    | -0.694755865    | -0.399709406   | -0.470314422   | -0.605507952 | -0.131106634  | -0.475993158  | 0.798279764    |
| 22     | -0.798165912   | -0.460185011   | -0.486989066   | -0.067190501    | 1.051509265     | -0.09647391    | -0.186276565   | -0.476100659 | 0.757682005   | -0.09852665   | -0.015195871   |
| 23     | -0.084116918   | 2.475753658    | 3.428397816    | 3.579299435     | 0.794469289     | -0.530228744   | -0.34783661    | -0.579422543 | 1.155912119   | 3.753578293   | 1.727761655    |
| 24     | -0.102107423   | 0.485746644    | 0.431062113    | 0.485450795     | 1.455602961     | 1.52637046     | 1.01035713     | -0.246542506 | 0.856447918   | 1.176275055   | -0.888921581   |
| 25     | -0.714697342   | -0.489919289   | -0.531218471   | -0.94139573     | -0.821291779    | -1.511080968   | -1.087637457   | -0.292497858 | -0.350930665  | -0.064610107  | -1.061243117   |
| 26     | -0.842912202   | -0.65171456    | -0.602345727   | -0.387207189    | -0.793139061    | -0.309121221   | -1.482993558   | 0.22527219   | -0.679631822  | -0.775854094  | 0.073647246    |
| 27     | -0.459891353   | -0.157291948   | -0.12811027    | 2.13814198      | 0.634584833     | 1.523837161    | 0.117464139    | -0.218321171 | -0.163290387  | -0.115599475  | -0.92090419    |
| 28     | -0.079726149   | 0.143654916    | 0.167162977    | 0.073288335     | 0.075833503     | 0.049722412    | 1.422213032    | -0.358788637 | -0.15644737   | -0.356501695  | -0.394452362   |
| 29     | -1.011758717   | -0.544693747   | -0.51670658    | -0.544200981    | -0.755897609    | -0.392314477   | -0.578968279   | -0.22313502  | -0.652319438  | -0.817653163  | 0.139536308    |
| 30     | -0.82234017    | -0.28424761    | -0.504725647   | -0.872057285    | -0.957079254    | -1.862717651   | -0.814760648   | -0.247530902 | -0.386946878  | 0.106825329   | -2.065209939   |
| 31     | 2.937266696    | 0.024197368    | 0.178332455    | 0.576827293     | -0.866661851    | -1.073065988   | -1.080080421   | 4.413514098  | -1.616867419  | -0.808974388  | 0.970330222    |
| 32     | -0.207218611   | -0.194798598   | -0.187093757   | 0.013822317     | 0.016822736     | -0.422512006   | 1.85033551     | -0.192770446 | 0.172351239   | 0.077634679   | 0.009306258    |
| 33     | -1.368156417   | -0.562499645   | -0.571502475   | -1.010143232    | -1.052712642    | -0.872668588   | 0.329239637    | -0.296615156 | -0.765482261  | -1.141526932  | -0.484071802   |
| 34     | 1.580975261    | -0.653313595   | -0.549290008   | -0.854647557    | -0.477516368    | -0.314658547   | -0.269942383   | -0.268006465 | -0.221051975  | -0.622141592  | 2.939519614    |
| 35     | -0.329075402   | 0.240533376    | 0.25308969     | -0.257122863    | 0.045698664     | 1.021031091    | 1.026524992    | -0.342202088 | -0.744487103  | 0.057052293   | -1.019527349   |
| 36     | 0.283866819    | 0.025543504    | 0.093792234    | -0.105491176    | 0.107653449     | -0.311927103   | -0.036343818   | 0.242936755  | -0.006451716  | 0.145846027   | 0.175703572    |
| 37     | 0.133110455    | -0.592910584   | -0.571349986   | -0.904971907    | -0.698302747    | -0.44789354    | 0.391907248    | -0.266490988 | -0.461132635  | -0.949778144  | 0.18416456     |
| 38     | 0.425137081    | -0.39655783    | -0.458562763   | 0.58737744      | -0.350972817    | -0.572994353   | 1.479611233    | -0.295852841 | 0.348691388   | 0.317832536   | 0.04345619     |
| 39     | 0.413908519    | 0.282057208    | 0.145298861    | -0.41952548     | -0.004351556    | -0.425633239   | -0.147495297   | -0.045703273 | -0.04119959   | -0.121493948  | 1.078127642    |
| 40     | -0.435969151   | -0.336534034   | -0.307427288   | -0.327590836    | 0.040718446     | 0.053997186    | 0.703154634    | -0.221361187 | -0.365088365  | -0.565949368  | 0.742874365    |
| 41     | 0.530375219    | 0.545284402    | 0.650656755    | 0.077906664     | 1.789759937     | 1.291542433    | -0.652936619   | -0.21091965  | 3.153348133   | 3.016252394   | -0.05298129    |
| 42     | 1.644104139    | 4.165649946    | 4.157291174    | 3.119527361     | 2.9533924       | 0.752499539    | -2.009586838   | -0.414029537 | 1.759431287   | 1.727245417   | 0.278767886    |
| 43     | -0.36478241    | -0.345546571   | -0.299095287   | 0.123232027     | 0.514876854     | 0.080764884    | -0.045519253   | -0.332026435 | 1.164735662   | 1.149724167   | -0.203238627   |
| 44     | -0.280731285   | -0.594554288   | -0.539181489   | -0.819647289    | -0.88123385     | 0.213503583    | -0.510129832   | -0.352565596 | -0.399057994  | -0.866415094  | 0.908544685    |
| 45     | -0.929377556   | -0.108085064   | -0.310076511   | 0.248427312     | 0.024215749     | 2.003318933    | 0.385586848    | -0.056363285 | -0.44462001   | -0.568189899  | -0.453428291   |
| 46     | -1.161725571   | -0.5947186     | -0.553789404   | -0.746870439    | -0.987182915    | -0.158281091   | -0.130766693   | -0.406874312 | -0.730137422  | -0.860858595  | -1.491382247   |

Additional File 5 : Normalized expression values of microRNAs associated with hepatocellular carcinoma (page 3)

| sl No. | hsa-miR-143-5p | hsa-miR-143-3p | hsa-miR-145-5p | hsa-miR-125a-5p | hsa-miR-136-3p | hsa-miR-146a-5p | hsa-miR-185-5p | hsa-miR-186-5p | hsa-miR-200a-3p | hsa-miR-151a-5p | hsa-miR-151a-3p |
|--------|----------------|----------------|----------------|-----------------|----------------|-----------------|----------------|----------------|-----------------|-----------------|-----------------|
| 1      | -1.133674165   | -0.967492954   | -0.622658921   | -0.547246512    | -0.953867472   | -0.386581071    | 2.962179934    | 2.402079201    | -0.797569292    | -0.057026083    | 2.849912437     |
| 2      | -0.953849556   | -0.741006377   | -0.580562747   | -0.722936531    | -0.819552127   | -0.664569832    | 0.035032469    | 0.656222454    | -0.76041177     | -0.600073781    | -0.002218806    |
| 3      | 1.044135145    | 0.704853897    | -0.026936248   | -0.204977469    | 0.547689889    | -0.318891097    | -0.747417994   | -0.261123281   | -0.519457415    | -1.6916885      | -1.06707782     |
| 4      | -0.242577948   | -0.510667284   | -0.389463137   | -0.339069342    | -0.527868841   | -0.544964181    | -0.431985348   | -0.306579133   | -0.66253392     | -0.005771116    | 0.548622051     |
| 5      | -1.245636916   | -0.975693985   | -0.707465902   | -0.817961474    | -0.791968044   | -0.773283252    | -0.023175818   | -0.639447153   | -0.58195728     | -1.598325121    | -0.735366898    |
| 6      | 1.396160635    | 0.423106886    | -0.205417762   | 0.020695395     | -0.135371335   | 0.618641555     | 0.222164272    | 0.159372334    | -0.263822605    | -0.189898705    | -0.069705774    |
| 7      | -0.828288611   | -0.577195603   | -0.570857013   | 0.92944723      | -0.488844554   | 2.825354958     | 1.553757838    | 3.173472698    | 1.100367235     | 0.312618477     | 1.050471377     |
| 8      | 1.179765003    | 3.213755337    | 2.585563336    | 1.180901014     | 1.790541326    | 0.510275161     | -0.038806726   | 0.01044123     | 1.192758199     | 0.059452174     | -0.423282427    |
| 9      | 0.951718391    | 0.236955486    | -0.040564585   | -0.17734672     | 0.161997521    | -0.662548276    | 0.078146391    | -0.57389946    | -0.745965805    | -1.103659118    | -0.942602052    |
| 10     | -0.944644206   | -0.958425529   | -0.67996588    | -0.715355977    | -0.952292918   | 2.715274975     | -1.05871103    | -0.555629775   | -0.745161648    | -0.323959544    | -0.854544581    |
| 11     | -0.839702057   | -0.743859164   | -0.426784527   | -0.654670774    | -0.877667795   | -0.778424276    | -1.081276707   | -0.829786988   | -0.641877203    | 0.444554299     | 0.18983786      |
| 12     | -0.174846047   | -0.103219606   | -0.491521791   | -0.708460616    | -0.625054318   | -0.62168999     | -0.372411039   | 1.061090604    | -0.430947024    | -0.380424797    | -0.149526933    |
| 13     | 0.593772436    | 1.30662726     | 1.139924       | 0.749607798     | 2.284290399    | 0.608215418     | -0.110213871   | 0.045488303    | 2.349654963     | -0.193702636    | -0.574421283    |
| 14     | 0.299341809    | 0.25705027     | -0.345993996   | -0.130145216    | 0.015447477    | -0.478266973    | -0.840352574   | -0.708925335   | -0.100352265    | -0.580842441    | -1.271976886    |
| 15     | 1.437730268    | 0.662658575    | -0.095789012   | -0.15692355     | 1.584264411    | -0.038001047    | 0.041636037    | -0.297649121   | 2.093167187     | -0.455542569    | -0.13950858     |
| 16     | 1.407157122    | 1.1776673      | 2.96455487     | 3.571655334     | 1.942344089    | 0.284146447     | -0.505404523   | -0.63764495    | -0.016789969    | 1.446367499     | -0.458268567    |
| 17     | -0.322847699   | -0.234445782   | -0.404154264   | -0.422525326    | -0.009195856   | -0.725493498    | -1.065472059   | -0.720863182   | -0.613110711    | -0.900505882    | -1.229304899    |
| 18     | -1.370716087   | -1.046080458   | -0.704133323   | -0.756253141    | -0.971778841   | -0.338908523    | -0.598248972   | -0.516682954   | -0.587655846    | 0.10372453      | -0.330994638    |
| 19     | -0.95890594    | -0.81981367    | -0.593187804   | -0.430504034    | -0.72764149    | -0.121812411    | 0.37047614     | -0.662363587   | -0.776638222    | -0.60392653     | 1.440833637     |
| 20     | -0.002198214   | -0.181520784   | -0.388862186   | -0.454266473    | -0.087191804   | -0.756603852    | -0.413211609   | 0.217644465    | -0.624420009    | 1.219215437     | 0.172332799     |
| 21     | -0.838006837   | -0.818033355   | -0.630788448   | -0.796528397    | -0.756948776   | -0.678358992    | 2.096654119    | -0.490822373   | 1.883777605     | 1.307595901     | 0.573111437     |
| 22     | -0.018744624   | 0.171343157    | 0.895770694    | 1.130396035     | 0.300473113    | 0.692202397     | -0.485758553   | -0.381371994   | 0.36856747      | 1.603119892     | -0.206647735    |
| 23     | 1.564858099    | 0.523436383    | 0.319294645    | 0.452468747     | 0.098195948    | -0.365713639    | 0.412399624    | -0.143022002   | -0.119621675    | 2.188698613     | 1.630326281     |
| 24     | 0.818797831    | 1.18613462     | 1.145312321    | 1.788434365     | 0.363229379    | 0.283895218     | 1.193088695    | 1.535632153    | 1.047957128     | -0.078799594    | 2.258850445     |
| 25     | -1.028726274   | -1.057432983   | -1.240014357   | -1.30600781     | -1.069516954   | 1.299076506     | 0.228223236    | -0.540580611   | -0.81958947     | -1.213110646    | -1.089185523    |
| 26     | -1.022558471   | -0.85453444    | -0.861087544   | -0.945645918    | -0.541128009   | -0.540790975    | -1.684142421   | -0.694717351   | -0.836110831    | -0.798149624    | -0.609149657    |
| 27     | 1.423174395    | 1.733788245    | 1.892962511    | 1.245745439     | 0.305887731    | -0.577258502    | -0.293150284   | 0.655811737    | -0.624346004    | -0.958773963    | 1.220101948     |
| 28     | -0.082714302   | 0.108302273    | 0.30941723     | 0.783222758     | -0.743534473   | -0.000931815    | 1.463042254    | 0.509420799    | 0.15738173      | 2.56526163      | 1.405155588     |
| 29     | -0.763223036   | -0.946379477   | -0.780973094   | -0.755502233    | -0.293950124   | -0.83290092     | -1.201658684   | -0.808496784   | -0.731742552    | -0.509844246    | -1.000644644    |
| 30     | -1.495238102   | -1.320993433   | -1.322466168   | -1.444232816    | -1.204604328   | -0.570175791    | 1.33227164     | -1.659577631   | -0.950306064    | -1.463336583    | -1.642741336    |
| 31     | 0.739575192    | -0.664268315   | -0.800692712   | -0.904430244    | -0.856623778   | -0.991228705    | 0.475388948    | 0.745961115    | -0.641607789    | 0.995431423     | 0.727021751     |
| 32     | 0.96025615     | 1.060980899    | 1.144002528    | 0.228461738     | -0.334324313   | -0.631415129    | -0.304952903   | -0.99869417    | -0.36523404     | -0.032265065    | -0.456083017    |
| 33     | -1.248106303   | -1.29262194    | -0.979597951   | -0.990941877    | -0.48034676    | -0.880382749    | -1.614466778   | -1.712570737   | -0.954036392    | -0.287213857    | -0.890679166    |
| 34     | -0.603137962   | -0.320588143   | -0.6241257     | -0.281358734    | 2.478510022    | -0.949906934    | 1.390614602    | -0.107469091   | 1.346481978     | -1.704279515    | -0.524727022    |
| 35     | 0.328433752    | 1.416318582    | 0.111928688    | -0.521484511    | 1.44906621     | -0.418739709    | -0.263007272   | 0.303800236    | -0.096016888    | -0.071117446    | -0.042383265    |
| 36     | 0.037599714    | 0.491783269    | 0.130401774    | -0.078691525    | 0.53380074     | 0.108655682     | 0.233858415    | 0.511487317    | 1.786640583     | 0.940840474     | 0.27422608      |
| 37     | -1.015669135   | -0.962360057   | -0.918634909   | -0.803499817    | 1.563107858    | -0.598717496    | -1.456544255   | -0.9868198     | -0.188720603    | -0.516190522    | -0.939131894    |
| 38     | -0.393038417   | -0.398557235   | -0.633444463   | -0.226939297    | 1.427924093    | 0.435058191     | 0.455946816    | 0.308927985    | -0.317890352    | -0.130507693    | -0.304740733    |
| 39     | -0.290497226   | 0.298256545    | -0.034361937   | 0.130988603     | 0.399340939    | 0.014840669     | 0.293238619    | 0.461522955    | 1.872091704     | 1.206977956     | -0.006580783    |
| 40     | 0.106135656    | -0.644556906   | -0.250455318   | 0.239206064     | -0.862748824   | -0.389628473    | 0.285441655    | 0.363242887    | -0.391693889    | -0.174703155    | -0.58892125     |
| 41     | 1.162362282    | 0.923853013    | 1.601520833    | 0.959950407     | -0.941208972   | 3.236648104     | 0.372608509    | 1.63714096     | 0.578152405     | 0.557302792     | 1.601243415     |
| 42     | 2.145666828    | 1.393746424    | 0.708427686    | 1.858993519     | 0.498146027    | 1.007446326     | 1.050061539    | 1.463299979    | 2.164973194     | 0.478099635     | 0.670790678     |
| 43     | 1.175357291    | 0.593087395    | 0.945482995    | 1.233101195     | -0.243699701   | -0.000880966    | 0.05278864     | 0.857283706    | -0.682295512    | -0.143392683    | -0.053011902    |
| 44     | -1.110321265   | -1.233365708   | -0.92697768    | -0.964604274    | -0.632673327   | -0.410611518    | -1.50488742    | -1.272591536   | -0.747106244    | 0.002014817     | -0.696256627    |
| 45     | 0.155871403    | 0.489407371    | 1.383375267    | 0.755234965     | -0.814653438   | 1.407948986     | -0.503763549   | -0.572014116   | -0.606982092    | 1.335755864     | 0.686846913     |
| 46     | -1.008862331   | -1.090120496   | -0.903683145   | -0.931669033    | -0.351136134   | -0.829392896    | -1.369102701   | -1.071472295   | -1.095797786    | 0.343984043     | -0.416475501    |

Normalized expression values of microRNAs associated with hepatocellular carcinoma (page 4)

| sl No. | hsa-miR-92b-3p | hsa-miR-151b | hsa-miR-21-5p | hsa-miR-17-5p | hsa-miR-122-5p | hsa-miR-101-3p | hsa-miR-125b-5p | Class |
|--------|----------------|--------------|---------------|---------------|----------------|----------------|-----------------|-------|
| 1      | -0.415064534   | -0.053978448 | -1.065814533  | -0.124393289  | 1.733612148    | -1.570616745   | -0.188157921    | HT    |
| 2      | -0.402885694   | -0.571753222 | -0.233831541  | 0.167922931   | 0.977485079    | -0.645824161   | -0.558534559    | HT    |
| 3      | -0.269738704   | -1.701885249 | 0.648144254   | -0.766105292  | -0.565268062   | 0.450813853    | -0.161703018    | HT    |
| 4      | -0.430105326   | -0.030131763 | -0.601101824  | -0.683271572  | 0.773178159    | -0.223598342   | 0.418289181     | HT    |
| 5      | -0.48146726    | -1.588307147 | -0.056865871  | -0.314300415  | 1.365789403    | 0.593236632    | -1.024593354    | HT    |
| 6      | -0.037841536   | -0.162026119 | 2.522646626   | 0.55302873    | -1.711325436   | 0.876751681    | -0.878921169    | HT    |
| 7      | 0.603819014    | 0.308330649  | 0.392814915   | 3.623707499   | 0.397736233    | 1.520852515    | -1.175123308    | HT    |
| 8      | -0.008073999   | 0.076381467  | -0.445761613  | -0.370101337  | -1.51369708    | 2.657590482    | 1.478175956     | HT    |
| 9      | -0.306011498   | -1.138446304 | -0.412513273  | -0.661630558  | 0.398497173    | 0.337005274    | 0.027076695     | HT    |
| 10     | -0.455117542   | -0.37759946  | -0.3758315    | -0.288110844  | 0.681073535    | -0.254052094   | -0.748917039    | HT    |
| 11     | -0.451826251   | 0.347308674  | -1.650371577  | -0.424534319  | 0.887752616    | -1.155119775   | 0.578701358     | HT    |
| 12     | -0.439969068   | -0.221402384 | -0.307563774  | -0.306284141  | -0.570876334   | 0.505292603    | -0.039177116    | HT    |
| 13     | 0.033207738    | -0.149313127 | -0.635316215  | -0.239945208  | -0.239420363   | 0.794200316    | 1.254442286     | HT    |
| 14     | -0.272137734   | -0.59505483  | 0.343682313   | 0.151031257   | -0.210273196   | -0.090321631   | -0.48598285     | HT    |
| 15     | -0.196883831   | -0.502309185 | 0.769071591   | 1.4920227     | -1.025146052   | 0.140943001    | -0.511094345    | HT    |
| 16     | 0.509132026    | 1.435081622  | -0.243132406  | -0.541125034  | -0.489821269   | -1.119690276   | 3.034056753     | HT    |
| 17     | -0.362273437   | -0.862576724 | -1.217574695  | -0.41759615   | 0.874733205    | 0.270245661    | -0.197407598    | HT    |
| 18     | 4.363065025    | 0.100013741  | -0.689355797  | -0.719871162  | 0.586783719    | -0.65166214    | -0.113754702    | HT    |
| 19     | -0.420964371   | -0.609426194 | 1.121790511   | -0.63091788   | 0.161158487    | -1.845576423   | -0.935082094    | HT    |
| 20     | -0.37326273    | 1.110114153  | 0.336268971   | -0.471685292  | -0.33284344    | -0.40772921    | -0.168179061    | HT    |
| 21     | -0.440916548   | 1.210320699  | 1.509316013   | -0.457704752  | -1.253449144   | 0.490853937    | -0.960598783    | HT    |
| 22     | 0.011469807    | 1.768139997  | -1.14977324   | -0.088393865  | 0.860684594    | -0.60912722    | 1.41695696      | HT    |
| 23     | 0.243846455    | 2.208519155  | 1.441072664   | 1.518257994   | -1.786363976   | -0.06446794    | -0.060472274    | HT    |
| 24     | 1.473312522    | -0.112793363 | 0.549200638   | -0.689430379  | -1.074274658   | -0.34750587    | 1.148721432     | HT    |
| 25     | -1.00900627    | -1.206170745 | -0.598917762  | 0.257176168   | 1.233637636    | -0.390241189   | -1.601576164    | HNT   |
| 26     | -0.733550726   | -0.859818094 | -0.708374283  | -0.557072147  | 0.898139036    | 0.365000356    | -0.965769195    | HNT   |
| 27     | 1.103011294    | -0.992489584 | -0.005808379  | -0.201406609  | -0.449961402   | -0.754228796   | 1.602277415     | HNT   |
| 28     | 0.927509654    | 2.475148945  | 0.053893614   | -0.512625607  | 0.140544005    | -0.361718682   | 0.75206205      | HNT   |
| 29     | -0.903484556   | -0.47904458  | -0.877147144  | -0.630783252  | 0.590105278    | 0.549719175    | -0.843563854    | HNT   |
| 30     | -1.138538781   | -1.433394573 | -1.159685584  | -0.665463474  | 2.062067659    | -1.126804854   | -1.825233799    | HNT   |
| 31     | -0.670806746   | 0.829552201  | 1.673057719   | 2.96722713    | -0.484387675   | -0.113712309   | -0.669926872    | HNT   |
| 32     | 0.216366722    | -0.048766649 | -0.067852838  | -0.646658414  | -0.398392127   | 0.243503211    | 0.735558044     | HNT   |
| 33     | -1.021994701   | -0.162655074 | -0.993343157  | -1.38754268   | 0.803723336    | -0.120038492   | -0.925534195    | HNT   |
| 34     | -0.787571287   | -1.717792402 | -0.455640223  | 1.803493433   | -0.781524286   | 2.942713082    | 0.152861383     | HNT   |
| 35     | 0.149950349    | -0.008948038 | 0.214683216   | -0.93594774   | -0.120868431   | -0.400518614   | -0.241391157    | HNT   |
| 36     | -0.003414788   | 1.032966937  | 0.177508827   | 0.193383107   | -0.145724798   | 0.166331343    | 0.1379975       | HNT   |
| 37     | -1.000139542   | -0.501186211 | -0.626202891  | 0.822955821   | 0.212857727    | 1.578411698    | -0.585206637    | HNT   |
| 38     | -0.346949727   | -0.151500448 | 0.61537014    | 0.143344294   | -0.563605524   | 1.133878182    | -0.26882067     | HNT   |
| 39     | 0.015122582    | 1.299071564  | 0.501798539   | 0.223665682   | -0.539211001   | 1.204807328    | 0.356769639     | HNT   |
| 40     | -0.489784456   | -0.261178159 | 0.151788672   | 1.439344731   | 0.33266673     | -0.280072474   | 0.299673703     | HNT   |
| 41     | 1.804176151    | 0.651303344  | -0.374960716  | 0.150312105   | -0.643324834   | -1.133393156   | 0.655538338     | HNT   |
| 42     | 2.086656024    | 0.47931532   | 3.324629702   | -0.616855269  | -2.774792454   | -0.507830649   | 1.404588132     | HNT   |
| 43     | 0.596599712    | -0.255720801 | 0.240046261   | -0.436320494  | -0.241733899   | -1.166691136   | 0.591330882     | HNT   |
| 44     | -1.010660154   | 0.041440955  | -0.897458664  | -0.266913705  | 1.274581232    | -0.541325759   | -1.31006995     | HNT   |
| 45     | 0.743196725    | 1.382659457  | -0.736585688  | -0.453882701  | 0.66947845     | -0.940282397   | 1.399713973     | HNT   |
| 46     | -0.910644981   | 0.37556983   | -1.158007584  | -1.727775682  | 1.231372494    | -0.917937894   | -0.614029589    | HNT   |
