# Supplementary material for: An approach to forecast human cancer by profiling microRNA expressions from NGS data
Source: Springer Nature journal article supplement (doi:10.1186/s12885-016-3042-2), 2017-01-25
Supplement: MOESM6 [file 12019118]

Additional File 6 : Normalized expression values of microRNAs associated with carcinomas of the bladder (page 1)

| sl No. | hsa-miR-16-5p | hsa-miR-17-5p | hsa-miR-18a-5p | hsa-miR-19a-3p | hsa-miR-23a-3p | hsa-miR-26a-5p | hsa-miR-26b-5p | hsa-miR-96-5p | hsa-miR-99a-5p | hsa-miR-103a-3p | hsa-miR-192-5p | hsa-miR-10b-5p | hsa-miR-34a-5p |
|--------|---------------|---------------|----------------|----------------|----------------|----------------|----------------|---------------|----------------|-----------------|----------------|----------------|----------------|
| 1      | 0.010226116   | 0.008777757   | 0.001036628    | 0.00038107     | 0.002153558    | 0.006816924    | 0.005099918    | 0.000801562   | 5.11014E-05    | 0.076002354     | 0.004790389    | 0.005451787    | 0.000411731    |
| 2      | 0.005993093   | 0.001424266   | 6.87212E-05    | 3.09623E-05    | 0.002905925    | 0.009602089    | 0.00456052     | 0.000021145   | 0.001526215    | 0.024886138     | 0.001437104    | 0.008636216    | 0.000188039    |
| 3      | 0.014635878   | 0.011141044   | 0.001171678    | 0.000561309    | 0.012371884    | 0.010930373    | 0.007044499    | 0.000419899   | 0.000204899    | 0.088512214     | 0.000782081    | 0.005540942    | 0.000681074    |
| 4      | 0.010630001   | 0.003376491   | 0.000338838    | 0.000174769    | 0.004094589    | 0.018812046    | 0.01123872     | 0.000208058   | 0.002060373    | 0.051390425     | 0.001244784    | 0.006266719    | 0.000438706    |
| 5      | 0.005823054   | 0.001962721   | 0.000184471    | 0.000046796    | 0.002124133    | 0.006497188    | 0.002784703    | 1.35641E-05   | 0.001104793    | 0.022548905     | 0.00214787     | 0.006491763    | 9.15575E-05    |
| 6      | 0.020793007   | 0.001896394   | 5.04957E-05    | 0.000218815    | 0.007877329    | 0.015659277    | 0.014638142    | 0.001099684   | 0.000106602    | 0.088833157     | 0.004539002    | 0.025730364    | 0.001615862    |
| 7      | 0.03500873    | 0.002087606   | 2.13021E-05    | 1.61896E-05    | 0.059402195    | 0.118262464    | 0.035181703    | 0.000275223   | 0.007528164    | 0.107326816     | 0.02978375     | 0.002424179    | 0.001276422    |
| 8      | 0.013337863   | 0.010685533   | 0.001779108    | 0.000655461    | 0.002922353    | 0.011384546    | 0.00830105     | 0.000128479   | 4.35522E-05    | 0.138517788     | 0.002238583    | 0.005487578    | 0.000213406    |
| 9      | 0.00666603    | 0.005680051   | 0.000369996    | 0.000306975    | 0.002959969    | 0.010943348    | 0.008601394    | 0.00066274    | 3.45601E-05    | 0.057530337     | 0.003945948    | 0.010264344    | 0.000679004    |
| 10     | 0.00666603    | 0.005680051   | 0.000369996    | 0.000306975    | 0.002959969    | 0.010943348    | 0.008601394    | 0.00066274    | 3.45601E-05    | 0.057530337     | 0.003945948    | 0.010264344    | 0.000679004    |
| 11     | 0.76625094    | 0.505959876   | 0.462556042    | 0.489583436    | 0.70153526     | 0.645503244    | 0.592855631    | 0.505714025   | 0.435663037    | 0.64135967      | 0.492699778    | 0.864119739    | 0.573575991    |
| 12     | -0.296670622  | -3.066626296  | -1.881914496   | -1.513164497   | 0.561760869    | 0.502658587    | 0.325380529    | -0.61279294   | 0.447205687    | 0.026691253     | 0.403956377    | -1.523818198   | -0.73261022    |
| 13     | 0.755381094   | 0.502249082   | 0.409888184    | 0.473955291    | 0.684541446    | 0.636863277    | 0.571695622    | 0.504420381   | 0.437260798    | 0.611792849     | 0.490776655    | 0.785266005    | 0.519933068    |
| 14     | 0.772531187   | 0.477285551   | 0.309544474    | 0.459237685    | 0.70283114     | 0.646367932    | 0.566302756    | 0.501458473   | 0.440656856    | 0.612075766     | 0.491749088    | 0.82111119     | 0.56117812     |
| 15     | 0.70360765    | 0.364983446   | 0.365596676    | 0.495866734    | 0.692823324    | 0.63044713     | 0.571613705    | 0.503702423   | 0.434218258    | 0.575971489     | 0.482730206    | 0.711264218    | 0.579992364    |
| 16     | 0.817343692   | 0.672558299   | 0.544184075    | 0.538715803    | 0.728106859    | 0.668114241    | 0.607516985    | 0.498358956   | 0.445564285    | 0.676303013     | 0.49787496     | 0.848056123    | 0.561318714    |
| 17     | 0.211990675   | 0.542319646   | 0.542435731    | 0.543188526    | -0.990867787   | -0.63244192    | 0.096549274    | 0.495309895   | -0.451624647   | 0.547097058     | 0.436001683    | 0.883420842    | 0.51306913     |
| 18     | 0.784044802   | 0.57478485    | 0.496802962    | 0.502291586    | 0.711460439    | 0.6211014      | 0.563039141    | 0.500056601   | 0.438625583    | 0.671943959     | 0.493533227    | 0.696682823    | 0.527196939    |
| 19     | 0.607463289   | 0.243775304   | 0.213227104    | 0.352874296    | 0.675765173    | 0.608970476    | 0.542232549    | 0.480272111   | 0.42975154     | 0.477861432     | 0.472639005    | 0.064674012    | 0.322751285    |
| 20     | 0.330208523   | -0.169718514  | 0.055083961    | -0.30301613    | 0.502375665    | 0.535501508    | 0.446344236    | 0.456753265   | 0.411017265    | 0.408850858     | 0.471723646    | -1.531403866   | 0.241936594    |

Additional File 6 : Normalized expression values of microRNAs associated with carcinomas of the bladder (page 2)

| sl No. | hsa-miR-182-5p | hsa-miR-183-5p | hsa-miR-205-5p | hsa-miR-210-3p | hsa-miR-214-3p | hsa-miR-221-5p | hsa-miR-221-3p | hsa-miR-222-3p | hsa-miR-223-3p | hsa-miR-200b-3p | hsa-miR-23b-3p |
|--------|----------------|----------------|----------------|----------------|----------------|----------------|----------------|----------------|----------------|-----------------|----------------|
| 1      | 0.117263068    | 0.07143827     | 0.010329779    | 0.000436552    | 8.76024E-06    | 0.00074024     | 0.000852663    | 0.000845363    | 7.73821E-05    | 0.06144284      | 0.003359551    |
| 2      | 0.002865901    | 0.003188362    | 0.007164374    | 0.000169915    | 7.17419E-05    | 0.000809551    | 0.000512766    | 0.001399345    | 0.000135932    | 0.009779556     | 0.002731479    |
| 3      | 0.046300051    | 0.014943227    | 0.024351284    | 0.003591511    | 9.52349E-05    | 0.018068664    | 0.005988257    | 0.006338895    | 0.000264061    | 0.021901149     | 0.00587715     |
| 4      | 0.01334546     | 0.009971347    | 0.006920617    | 0.000236592    | 0.000340027    | 0.002826028    | 0.000779922    | 0.001811891    | 0.000859578    | 0.01310649      | 0.003078075    |
| 5      | 0.002409657    | 0.002191953    | 0.001145485    | 0.000073246    | 3.93358E-05    | 0.00036623     | 0.000244153    | 0.000991533    | 0.000334354    | 0.007139447     | 0.002752827    |
| 6      | 0.17727918     | 0.062738101    | 0.026785163    | 0.001088463    | 9.53808E-05    | 0.012062862    | 0.001026746    | 0.001660747    | 0.000824763    | 0.024288431     | 0.006143643    |
| 7      | 0.00842626     | 0.002966105    | 0.04311631     | 0.01589563     | 0.000284596    | 0.003617949    | 0.002239277    | 0.011403442    | 0.001210812    | 0.039022898     | 0.026756295    |
| 8      | 0.037001953    | 0.014820815    | 0.022159362    | 0.001726845    | 0.000119769    | 0.007475736    | 0.000801361    | 0.003072608    | 0.001432868    | 0.01149996      | 0.001215107    |
| 9      | 0.07635135     | 0.056030023    | 0.01240097     | 0.00113845     | 4.06589E-06    | 0.001002242    | 0.000587521    | 0.001091692    | 4.06589E-05    | 0.062919676     | 0.00241514     |
| 10     | 0.07635135     | 0.056030023    | 0.01240097     | 0.00113845     | 4.06589E-06    | 0.001002242    | 0.000587521    | 0.001091692    | 4.06589E-05    | 0.062919676     | 0.00241514     |
| 11     | 0.437944972    | 0.44804522     | 0.361467954    | 0.759613303    | 0.492947956    | 0.776031273    | 0.605247428    | 0.71193217     | 0.442381474    | 0.411105566     | 0.608279448    |
| 12     | -0.745505139   | -2.304490632   | -3.783732043   | -1.727201294   | 0.49014917     | 0.552207423    | 0.523170042    | 0.68741934     | 0.402971001    | -3.774042639    | 0.499805779    |
| 13     | 0.366370791    | 0.390269066    | 0.305083554    | 0.748988028    | 0.487053179    | 0.176046018    | 0.529445054    | 0.702350706    | 0.406263929    | 0.34190586      | 0.593954327    |
| 14     | 0.331835137    | 0.379660036    | 0.309414517    | 0.756755731    | 0.487905303    | 0.364762629    | 0.527685225    | 0.687955001    | 0.421660757    | 0.340972343     | 0.607723857    |
| 15     | 0.321712707    | 0.373396727    | 0.347043217    | 0.723455149    | 0.491336308    | 0.691880351    | 0.593413737    | 0.697932547    | 0.376108881    | 0.334046199     | 0.544450474    |
| 16     | 0.490968013    | 0.420808665    | 0.378230556    | 0.777122128    | 0.475190099    | 0.741420229    | 0.624223416    | 0.739130108    | 0.429791293    | 0.372710584     | 0.68776808     |
| 17     | 0.327445738    | 0.377690177    | -0.096453597   | -0.548105045   | 0.370455088    | -1.880369023   | -0.369316548   | -1.022585422   | 0.051158777    | 0.235176007     | -2.855819136   |
| 18     | 0.352198401    | 0.384834027    | 0.297067933    | 0.744079493    | 0.474996904    | 0.642652158    | 0.609175501    | 0.717885294    | 0.435089833    | 0.307405147     | 0.657540772    |
| 19     | 0.3568671      | 0.266212683    | -0.076125533   | 0.599269529    | 0.485490943    | 0.608045981    | 0.521432038    | 0.641596506    | 0.383077934    | 0.024459037     | 0.560210451    |
| 20     | 0.375503962    | 0.343230327    | -0.337538669   | 0.536737382    | 0.47985365     | 0.500749652    | 0.512121863    | 0.646233737    | 0.24337145     | -0.443077073    | 0.428032047    |

Additional File 6 : Normalized expression values of microRNAs associated with carcinomas of the bladder (page 3)

| sl No. | hsa-miR-125b-5p | hsa-miR-133a-3p | hsa-miR-141-3p | hsa-miR-143-3p | hsa-miR-144-5p | hsa-miR-145-5p | hsa-miR-126-5p | hsa-miR-126-3p | hsa-miR-185-5p | hsa-miR-195-5p | hsa-miR-200c-3p |
|--------|-----------------|-----------------|----------------|----------------|----------------|----------------|----------------|----------------|----------------|----------------|-----------------|
| 1      | 0.000414651     | 7.3002E-06      | 0.020425952    | 0.179246123    | 0.004949534    | 0.000470133    | 0.002449946    | 0.007906114    | 0.000849743    | 0.000420491    | 0.35121687      |
| 2      | 0.00979768      | 2.94519E-05     | 0.001767872    | 0.766048855    | 0.00430527     | 0.002261003    | 0.003408119    | 0.01855548     | 0.000220512    | 0.001727092    | 0.075089621     |
| 3      | 0.002248122     | 5.77181E-06     | 0.016595409    | 0.458019431    | 0.002320269    | 0.001004296    | 0.001243826    | 0.00900403     | 0.001034598    | 0.000603155    | 0.145484349     |
| 4      | 0.00886091      | 3.68561E-05     | 0.003823519    | 0.635517352    | 0.015956296    | 0.002685737    | 0.005730523    | 0.03338089     | 0.000844123    | 0.00260608     | 0.046395834     |
| 5      | 0.006387997     | 5.49345E-05     | 0.0009739      | 0.84394812     | 0.006684372    | 0.004203504    | 0.002713492    | 0.016527138    | 0.000238049    | 0.001438469    | 0.021170796     |
| 6      | 0.000572285     | 3.26042E-05     | 0.022246161    | 0.226950116    | 0.004808313    | 0.000392744    | 0.000471293    | 0.005504031    | 0.001223118    | 0.003832063    | 0.208519186     |
| 7      | 0.003787514     | 4.26042E-05     | 0.002883453    | 0.089292455    | 0.000572601    | 0.01243702     | 0.00221201     | 0.000510398    | 0.037311061    | 0.002483825    | 0.071001616     |
| 8      | 0.003691049     | 2.17761E-06     | 0.015622176    | 0.1497695      | 0.007689142    | 0.000111058    | 0.001580945    | 0.029700426    | 0.002867913    | 0.00060102     | 0.248071182     |
| 9      | 0.000412688     | 2.03295E-06     | 0.028530363    | 0.147878519    | 0.002535084    | 0.000319173    | 0.001211636    | 0.006135431    | 0.000748124    | 0.000333403    | 0.422862916     |
| 10     | 0.000412688     | 2.03295E-06     | 0.028530363    | 0.147878519    | 0.002535084    | 0.000319173    | 0.001211636    | 0.006135431    | 0.000748124    | 0.000333403    | 0.422862916     |
| 11     | 0.339624876     | 0.350330391     | 0.390738527    | -0.830898058   | 0.410272532    | 0.505741669    | 0.579888644    | 0.221316736    | 0.572376412    | 0.422540039    | 0.689535994     |
| 12     | 0.405979148     | 0.51502716      | -3.769505891   | 1.794336829    | -0.684669176   | 0.573087054    | -0.322856545   | -0.508407115   | 0.528806154    | 0.486351367    | -3.739285732    |
| 13     | 0.332742773     | 0.311798425     | 0.354802522    | -0.501874513   | 0.495246201    | 0.502847851    | 0.582859135    | -0.313378773   | 0.569538727    | 0.435810646    | 0.454570232     |
| 14     | 0.372152787     | 0.347415249     | 0.353644561    | -0.34255323    | 0.343810444    | 0.4793593      | 0.351603899    | 0.130982287    | 0.570878173    | 0.408344545    | 0.375155472     |
| 15     | 0.337325833     | 0.291339254     | 0.374933198    | -0.132301739   | -0.824724572   | 0.356807745    | 0.515745694    | 0.298857633    | 0.570289215    | 0.393332867    | 0.354960662     |
| 16     | 0.393449165     | 0.491849144     | 0.387085891    | -0.816262947   | 0.717296532    | 0.561243911    | 0.823566929    | 0.689307967    | 0.572709879    | 0.409440172    | 0.538504496     |
| 17     | 0.094307856     | -3.384073647    | 0.36957911     | 0.171158513    | 0.747480627    | -2.816973721   | 0.670013612    | 0.832859618    | 0.168701421    | 0.082885717    | 0.375018108     |
| 18     | 0.381318577     | 0.451350718     | 0.343942135    | -0.831181754   | -0.156053291   | 0.555863012    | 0.648687374    | 0.113028113    | 0.572906658    | 0.431721354    | 0.521778247     |
| 19     | 0.296916591     | 0.393506957     | -0.079066897   | -0.611115045   | -0.849333868   | 0.509135706    | -0.296590776   | -0.394409534   | 0.564534289    | 0.394527805    | 0.407607784     |
| 20     | 0.267470166     | 0.478904688     | -0.387122364   | -0.307689598   | -3.138063288   | 0.514433672    | -1.556852137   | -2.252851509   | 0.555981639    | 0.33467973     | 0.069215764     |

Additional File 6 : Normalized expression values of microRNAs associated with carcinomas of the bladder (page 4)

| sl No. | hsa-miR-155-5p | hsa-miR-29c-3p | hsa-miR-200a-3p | hsa-miR-335-5p | hsa-miR-429  | hsa-miR-451a | hsa-miR-409-3p | hsa-miR-146b-5p | hsa-miR-493-5p | hsa-miR-320c | Class |
|--------|----------------|----------------|-----------------|----------------|--------------|--------------|----------------|-----------------|----------------|--------------|-------|
| 1      | 0.000213166    | 0.001249794    | 0.01814099      | 0.000182505    | 0.010494764  | 0.000883324  | 0.000106583    | 0.01148759      | 8.32222E-05    | 5.84016E-06  | BT    |
| 2      | 0.000137442    | 0.001302682    | 0.002303293     | 4.15348E-05    | 0.000999101  | 0.001768627  | 0.000129135    | 0.01986949      | 0.000111011    | 1.73691E-05  | BT    |
| 3      | 0.000471846    | 0.000137081    | 0.00551064      | 0.000336208    | 0.003093692  | 0.001030269  | 0.000186141    | 0.049727065     | 0.000206342    | 2.02013E-05  | BT    |
| 4      | 0.00045654     | 0.001251917    | 0.004639108     | 0.000181902    | 0.002787983  | 0.006440299  | 0.000311493    | 0.064199689     | 0.000312682    | 2.97226E-05  | BT    |
| 5      | 0.000737885    | 0.000678203    | 0.002105821     | 2.64499E-05    | 0.001649391  | 0.003310989  | 0.000140388    | 0.017429148     | 5.62909E-05    | 1.49205E-05  | BT    |
| 6      | 0.000364691    | 0.002536006    | 0.007299434     | 0.000241257    | 0.002536006  | 0.001812235  | 5.04957E-05    | 0.01346552      | 3.36638E-05    | 8.97701E-05  | BT    |
| 7      | 0.000469498    | 0.112049918    | 0.034449762     | 0.001544829    | 0.017214656  | 0.038251762  | 0.000199388    | 0.019581746     | 5.62376E-05    | 0.000113327  | BT    |
| 8      | 0.003871791    | 0.000139367    | 0.004222386     | 7.62164E-05    | 0.002421503  | 0.001256481  | 4.13746E-05    | 0.23109671      | 6.09731E-05    | 8.49268E-05  | BT    |
| 9      | 0.000284612    | 0.002433436    | 0.030069303     | 8.33508E-05    | 0.011740263  | 0.000652576  | 2.84612E-05    | 0.021069452     | 2.64283E-05    | 1.62636E-05  | BT    |
| 10     | 0.000284612    | 0.002433436    | 0.030069303     | 8.33508E-05    | 0.011740263  | 0.000652576  | 2.84612E-05    | 0.021069452     | 2.64283E-05    | 1.62636E-05  | BT    |
| 11     | 0.396271157    | 0.645523524    | 0.441448408     | 0.57154759     | 0.423863163  | 0.606978659  | 0.522550159    | 0.665785175     | 0.595047531    | 0.445787245  | BNT   |
| 12     | 0.352338743    | 0.481513322    | -3.670067133    | 0.190742613    | -3.69324176  | 0.581667375  | 0.465693869    | 0.515642892     | 0.520611261    | 0.438821308  | BNT   |
| 13     | 0.388744954    | 0.647352644    | 0.396638052     | 0.551599726    | 0.379803474  | 0.606154871  | 0.492579975    | 0.660483099     | 0.54884087     | 0.444685804  | BNT   |
| 14     | 0.393928799    | 0.644163163    | 0.406199492     | 0.554572089    | 0.377289485  | 0.593861418  | 0.513243443    | 0.626379542     | 0.577838804    | 0.443880594  | BNT   |
| 15     | 0.398077125    | 0.63597876     | 0.412990441     | 0.554458088    | 0.365130484  | 0.498980455  | 0.51848351     | 0.667009751     | 0.599201576    | 0.441443366  | BNT   |
| 16     | 0.397786849    | 0.654518589    | 0.440374975     | 0.571197155    | 0.420576028  | 0.615352006  | 0.516734915    | 0.672310359     | 0.587065954    | 0.446305019  | BNT   |
| 17     | 0.39326002     | -1.256196258   | -0.139406452    | 0.407617201    | 0.082850488  | -2.633492651 | 0.500603959    | 0.635585657     | 0.590372809    | 0.362085981  | BNT   |
| 18     | 0.398858914    | 0.649076174    | 0.372983207     | 0.568202075    | 0.346847067  | 0.600341289  | 0.521211685    | 0.884542741     | 0.577385277    | 0.445300132  | BNT   |
| 19     | 0.368142725    | 0.599645093    | -0.081609112    | 0.54356532     | -0.319614195 | 0.566829077  | 0.466740937    | 0.58202032      | 0.558882741    | 0.439283703  | BNT   |
| 20     | 0.279624986    | 0.535458556    | -0.721001783    | 0.518829038    | -0.585093692 | 0.509126208  | 0.439956454    | 0.13103822      | 0.408340669    | 0.435755771  | BNT   |
