# Supplementary material for: An approach to forecast human cancer by profiling microRNA expressions from NGS data
Source: Springer Nature journal article supplement (doi:10.1186/s12885-016-3042-2), 2017-01-25
Supplement: MOESM7 [file 12019118]

**Normalized Expression values of microRNAs associated with Lung Cancer (Independent Test Set) (page 1)**

| sl No. | hsa-let-7c-5p | hsa-let-7d-5p | hsa-let-7e-5p | hsa-let-7g-5p | hsa-let-7i-5p | hsa-miR-7-1-3p | hsa-miR-17-5p | hsa-miR-18a-5p | hsa-miR-18a-3p | hsa-miR-19a-3p |
|--------|---------------|---------------|---------------|---------------|---------------|----------------|---------------|----------------|----------------|----------------|
| 1      | 0.759859697   | 2.351264679   | 1.581500572   | 0.916132299   | 0.0604969     | -0.00621338    | -0.008099809  | -0.279324526   | 0.086010899    | -0.666874215   |
| 2      | -1.39517178   | -0.585827496  | -1.102009541  | -1.320450017  | -0.508340078  | -0.50675474    | 0.246948428   | 0.539796929    | 0.260903528    | 0.340999995    |
| 3      | -1.195043495  | -0.237214637  | -1.029035699  | 0.359750572   | -0.49166756   | -0.505784196   | -0.292543005  | -0.097009735   | -0.477347631   | -0.410612853   |
| 4      | 0.265498823   | -0.377361396  | -1.189513314  | -0.52740104   | -0.245488429  | -0.355148418   | 0.022798608   | 1.219243514    | 1.063455417    | 1.894250802    |
| 5      | 0.113820106   | -1.146973632  | 0.642547813   | -0.900611591  | -0.765339339  | -0.456625541   | -0.715063807  | -0.867995955   | -0.927354248   | -0.699427231   |
| 6      | -1.174950013  | -0.320466637  | 1.173793845   | -0.875190902  | -1.117074779  | -0.781158673   | -0.685064587  | -0.87913424    | -0.816669091   | -0.736428199   |
| 7      | 0.448999357   | 0.457659546   | 0.070598361   | 1.676110516   | 2.280851927   | 2.499284569    | 2.489287818   | 1.842296195    | 2.062701684    | -0.440104611   |
| 8      | 1.008523241   | 0.311583238   | -0.118640892  | 0.781683495   | 0.606240381   | 0.436829232    | -0.769657425  | -0.98614966    | -0.607362379   | -0.689493467   |
| 9      | 1.168464063   | -0.452663665  | -0.029241144  | -0.110023332  | 0.180320977   | -0.324428854   | -0.288606221  | -0.491722521   | -0.64433818    | 1.40768978     |

**Normalized Expression values of microRNAs associated with hepatocellular carcinoma (Independent Test Set)**

| sl No. | hsa-let-7c-5p | hsa-let-7d-5p | hsa-let-7e-5p | hsa-miR-18a-5p | hsa-miR-23a-3p | hsa-miR-27a-3p | hsa-miR-29a-3p | hsa-miR-30a-5p | hsa-miR-100-5p | hsa-miR-16-2-3p |
|--------|---------------|---------------|---------------|----------------|----------------|----------------|----------------|----------------|----------------|-----------------|
| 1      | 0.765563248   | 0.989763258   | 0.814972326   | -0.520691944   | 1.189604363    | -0.45600468    | 1.067940663    | -0.819792608   | -0.841704706   | -0.571160496    |
| 2      | -0.866275507  | -0.87581318   | -0.874877707  | 1.342869425    | -1.063406044   | 0.710346591    | -0.853870481   | 1.189878713    | 0.561121461    | 1.494154625     |
| 3      | 0.96096257    | 0.732590556   | 0.915563998   | -0.953119044   | 0.40915397     | -1.189037837   | 0.637107006    | -0.834522408   | -0.843911714   | -0.549014383    |
| 4      | -0.860250311  | -0.846540634  | -0.855658617  | 0.130941563    | -0.53535229    | 0.934695926    | -0.851177188   | 0.464436303    | 1.124494959    | -0.373979746    |

**Normalized Expression values of microRNAs associated with Lung Cancer (Independent Test Set) (page 2)**

| hsa-miR-19b-3p | hsa-miR-20b-5p | hsa-miR-24-1-5p | hsa-miR-29a-3p | hsa-miR-30c-2-3p | hsa-miR-33a-5p | hsa-miR-92b-3p | hsa-miR-1-3p | hsa-miR-23a-3p | hsa-miR-101-3p |
|----------------|----------------|-----------------|----------------|------------------|----------------|----------------|--------------|----------------|----------------|
| -0.674689208   | -0.784220607   | -0.136834607    | -0.50692254    | 0.06024948       | -0.321903783   | 0.167210932    | 0.074631611  | -0.554435118   | 0.813876552    |
| 0.15150369     | 1.156420594    | -0.404699327    | -0.728761326   | -0.530290009     | 1.546279006    | -0.830071488   | -0.612055849 | -0.324870049   | -0.94052827    |
| -0.339638311   | 0.237980058    | -1.210931787    | -0.183363262   | -0.420688841     | -0.521692103   | -0.157572406   | -0.51809953  | -0.082960876   | -0.352946527   |
| 1.29861296     | -0.266372366   | 0.519831477     | 0.338334171    | -0.347311027     | 0.507165821    | -0.492540556   | -0.685250765 | 1.106578957    | -0.218505801   |
| -0.636246559   | -0.134285258   | 0.167792125     | -0.082505206   | -0.534194004     | -0.823571232   | -0.619464424   | -0.35134628  | -0.713591983   | -0.851539894   |
| -0.726931514   | -1.12644396    | -1.323428966    | -0.193673716   | -0.598964348     | -1.187778626   | 0.663605466    | -0.309269899 | -0.911499992   | -0.657525358   |
| -0.420827575   | 1.941931837    | 1.436414953     | -0.771913852   | -0.298836577     | 1.574212404    | 2.351340985    | -0.60195352  | -0.380823512   | -0.4298073     |
| -0.686206495   | -0.92285248    | -0.468792207    | -0.377431008   | 0.086100268      | -0.62113811    | -0.737176966   | 0.555536919  | -0.321757553   | 0.4635969      |
| 2.034423012    | -0.102157816   | 1.420648342     | 2.506236739    | 2.583935057      | -0.151573376   | -0.345331543   | 2.447807312  | 2.183360125    | 2.173379697    |

**Normalized Expression values of microRNAs associated with hepatocellular carcinoma (Independent Test Set)**

| hsa-miR-197-3p | hsa-miR-148a-3p | hsa-miR-30d-5p | hsa-miR-34a-5p | hsa-miR-182-5p | hsa-miR-183-5p | hsa-miR-199b-3p | hsa-miR-204-5p | hsa-miR-210-3p | hsa-miR-217  |
|----------------|-----------------|----------------|----------------|----------------|----------------|-----------------|----------------|----------------|--------------|
| -0.598076955   | -0.80962468     | -0.916669045   | 1.434343246    | -0.764425762   | -0.786703091   | 1.34525647      | -0.648425348   | 1.087636961    | 0.722937785  |
| -0.014657351   | 1.134469169     | 0.385305694    | -0.671737906   | 0.184341338    | 0.209812       | -0.761214472    | -0.163417701   | 0.595542615    | -0.860542003 |
| -0.801416096   | -0.871197812    | -0.701293991   | -0.6980393     | -0.761961247   | -0.753349901   | 0.177172474     | -0.648425348   | -0.690215926   | 0.998146222  |
| 1.414150402    | 0.546353324     | 1.232657342    | -0.064566039   | 1.342045671    | 1.330240992    | -0.761214472    | 1.460268397    | -0.99296365    | -0.860542003 |

**Normalized Expression values of microRNAs associated with Lung Cancer (Independent Test Set) -page 3**

| hsa-miR-103a-3p | hsa-miR-197-3p | hsa-miR-135b-5p | hsa-miR-138-5p | hsa-miR-146a-5p | hsa-miR-148a-3p | hsa-miR-153-3p | hsa-miR-186-5p | hsa-miR-187-3p |
|-----------------|----------------|-----------------|----------------|-----------------|-----------------|----------------|----------------|----------------|
| -0.178235283    | 1.324156946    | 0.430874628     | 0.123422459    | -0.442841572    | 0.119168797     | -0.677194986   | -0.588691335   | 2.069974741    |
| -0.116267189    | -0.699261026   | -0.985220098    | -0.526579928   | -0.780967473    | -0.897975499    | 0.5412177      | -0.046889826   | 0.020286242    |
| -0.496320582    | -0.966490668   | -0.822666765    | -0.56727279    | 0.477406505     | 0.422497405     | -0.95590128    | -0.045507049   | -0.788813427   |
| 0.865185501     | -0.541404886   | -0.757604851    | 1.952773471    | -0.372702204    | 1.895833126     | 0.499285386    | 1.015224211    | -0.617803249   |
| -0.617084984    | -0.690700955   | 0.167447113     | 0.779281739    | -1.015717158    | -0.443402555    | -0.872381075   | -0.606379436   | -0.363715019   |
| -1.621843289    | -0.792178369   | 1.08647541      | -1.083668451   | -1.062442782    | -1.406560865    | -0.935000376   | -0.827661566   | -0.153643606   |
| 0.096538626     | 0.428320589    | 1.864544098     | -0.986654004   | 1.860427495     | -0.785383768    | 0.165965569    | -0.651980878   | -0.893487034   |
| 0.085072987     | 1.794999438    | -0.952343435    | -0.465976682   | 1.063345127     | 0.633029612     | 0.135363064    | -0.466841845   | -0.500187667   |
| 1.982954211     | 0.142558931    | -0.031506099    | 0.774674188    | 0.273492063     | 0.462793748     | 2.098645999    | 2.218727722    | 1.22738902     |

**Normalized Expression values of microRNAs associated with hepatocellular carcinoma (Independent Test Set)**

| hsa-let-7g-5p | hsa-let-7i-5p | hsa-miR-30b-5p | hsa-miR-125a-5p | hsa-miR-146a-5p | hsa-miR-185-5p | hsa-miR-186-5p | hsa-miR-200a-3p | hsa-miR-151a-5p |
|---------------|---------------|----------------|-----------------|-----------------|----------------|----------------|-----------------|-----------------|
| 0.96423841    | -0.810045874  | -0.765908463   | -0.832539253    | -0.829203149    | 0.937794096    | -0.818148888   | -0.847278966    | -0.808368876    |
| -0.84996864   | 0.912162791   | 0.251440743    | 1.12934035      | 0.475870057     | -0.864472058   | 0.407378185    | -0.847278966    | 0.424556856     |
| 0.761787825   | -0.918978614  | -0.795814872   | -0.851046733    | -0.829203149    | 0.79115002     | -0.814494329   | 1.100728579     | -0.830990711    |
| -0.876057595  | 0.816861697   | 1.310282591    | 0.554245636     | 1.182536241     | -0.864472058   | 1.225265032    | 0.593829354     | 1.214802731     |

**Normalized Expression values of microRNAs associated with Lung Cancer (Independent Test Set) -page 4**

| hsa-miR-194-5p | hsa-miR-199b-3p | hsa-miR-200a-3p | hsa-miR-210-3p | hsa-miR-215-5p | hsa-miR-21-5p | class |
|----------------|-----------------|-----------------|----------------|----------------|---------------|-------|
| -0.250880274   | 0.457188752     | 0.221207458     | 0.007212323    | 1.996646101    | -0.118231002  | LT    |
| -0.172747756   | 0.629713222     | 0.060063559     | -0.162769372   | -1.09825914    | 0.930060341   | LT    |
| 0.287786313    | -1.213905196    | -0.795568949    | -0.280139109   | -1.125893436   | 0.012507687   | LT    |
| 1.047700959    | -0.770900876    | -0.048284588    | -0.742662681   | -0.415152534   | -1.28816684   | LT    |
| -0.582568165   | -0.186887171    | 0.669440446     | 1.61083221     | -0.732447913   | 0.821818069   | LT    |
| -0.920469442   | -0.882069531    | -0.076051226    | -0.61526496    | 0.01461271     | 1.561446788   | LT    |
| 2.09837591     | -0.700441685    | 2.115426714     | 1.759191165    | 0.076663793    | 0.001479848   | LT    |
| -0.776682315   | 0.851083933     | -1.27321026     | -0.916312212   | 0.625145189    | -0.45895035   | LT    |
| -0.73051523    | 1.816218552     | -0.873023154    | -0.660087365   | 0.65868523     | -1.46196454   | LT    |

**Normalized Expression values of microRNAs associated with hepatocellular carcinoma (Independent Test Set)**

| hsa-miR-151a-3p | hsa-miR-92b-3p | hsa-miR-151b | hsa-miR-21-5p | hsa-miR-17-5p | hsa-miR-122-5p | hsa-miR-101-3 | hsa-miR-125b-5 | class |
|-----------------|----------------|--------------|---------------|---------------|----------------|---------------|----------------|-------|
| -0.850789156    | 0.481173723    | -0.807980472 | -0.669475905  | 1.47929043    | -0.336684519   | 1.039810286   | -0.651689439   | HT    |
| 0.65187857      | -0.840100616   | 0.423136784  | 1.369397413   | -0.525600519  | -0.576836174   | 0.329858498   | -0.155341896   | HT    |
| -0.857474546    | 1.179035492    | -0.830825557 | -0.814507672  | -0.275994645  | 1.490356867    | -0.02453459   | -0.651358728   | HT    |
| 1.056385132     | -0.820108598   | 1.215669245  | 0.114586164   | -0.677695266  | -0.576836174   | -1.34513419   | 1.458390064    | HT    |
